# Supplementary material for: Dual COX-2/5-LOX inhibitors from Zanthoxylum simulans inhibit gastric cancer cells by cross-mediating thyroid, estrogen, and oxytocin signaling pathways
Source: Front Chem. 2024 Jan 10;11:1287570. doi: 10.3389/fchem.2023.1287570 (PMC10805830; doi:10.3389/fchem.2023.1287570)
Supplement: Supplementary file 1 [file Table2.XLSX]

## Sheet: Data of Go Enrichment
GroupID	Category	Term	Description	LogP	Log(q-value)	Genes	Symbols	InTerm_InList
1_Summary	GO Biological Processes	GO:1904427	positive regulation of calcium ion transmembrane transport	-2.06833	-1.02185	187,481,2852,3627,4283,5319,7070,9104,9992,358,890,1536,2627,3162,3776,4609,5740,5743,7291,10449,54209,210,5359,9076,710,718,55061,2150,2771,3689,7305,929,22841,23643,118788,2281,5621,7412,9455,2650,6401,6402,3764,3784,6288,6347,151647,284340,1601,6696,51083,51738,1155,7277,7846,10381,2181,3033,55902,1040,55500,56994,2752,2805,2875,84706,1277,1280,1301,1649,1687,2876,3249,5205,5270,7852,54532,153…	APLNR,ATP1B1,GPER1,CXCL10,CXCL9,PLA2G1B,THY1,RGN,KCNE2,AQP1,CCNA2,CYBB,GATA6,HMOX1,KCNK2,MYC,PTGIS,PTGS2,TWIST1,ACAA2,TREM2,ALAD,PLSCR1,CLDN1,SERPING1,C3,SUSD4,F2RL1,GNAI2,ITGB2,TYROBP,CD14,RAB11FIP2,LY96,PIK3AP1,FKBP1B,PRNP,VCAM1,HOMER2,GCNT1,SELE,SELL,KCNJ8,KCNQ1,SAA1,CCL2,TAFA4,CXCL17,DAB2,SPP1,GAL,GHRL,TBCB,TUBA4A,TUBA1A,TUBB3,ACSL3,HADH,ACSS2,CDS1,ETNK1,CHPT1,GLUL,GOT1,GPT,GPT2,COL1A1,COL2A1…	319/-		Supplementary TABLE 2. Genes included in GO enrichment.Three clusters of genes, referring to hormone and inflammation in Figure 4B, could be found and further used to screen major and common genes in Figure 4C and 4D.
1_Member	GO Biological Processes	GO:1904427	positive regulation of calcium ion transmembrane transport	-2.06833	-1.02185	187,481,2852,3627,4283,5319,7070,9104,9992	APLNR,ATP1B1,GPER1,CXCL10,CXCL9,PLA2G1B,THY1,RGN,KCNE2	9/93
1_Member	GO Biological Processes	GO:0036294	cellular response to decreased oxygen levels	-2.06614	-1.02185	358,890,1536,2627,3162,3776,4609,5740,5743,7291,10449,54209	AQP1,CCNA2,CYBB,GATA6,HMOX1,KCNK2,MYC,PTGIS,PTGS2,TWIST1,ACAA2,TREM2	12/144
1_Member	GO Biological Processes	GO:0010288	response to lead ion	-2.06613	-1.02185	210,5359,5743,9076	ALAD,PLSCR1,PTGS2,CLDN1	4/22
1_Member	GO Biological Processes	GO:0030449	regulation of complement activation	-2.06613	-1.02185	710,718,54209,55061	SERPING1,C3,TREM2,SUSD4	4/22
1_Member	GO Biological Processes	GO:0032928	regulation of superoxide anion generation	-2.06613	-1.02185	2150,2771,3689,7305	F2RL1,GNAI2,ITGB2,TYROBP	4/22
1_Member	GO Biological Processes	GO:0034142	toll-like receptor 4 signaling pathway	-2.06613	-1.02185	929,22841,23643,118788	CD14,RAB11FIP2,LY96,PIK3AP1	4/22
1_Member	GO Biological Processes	GO:0035584	calcium-mediated signaling using intracellular calcium source	-2.06613	-1.02185	2281,5621,7412,9455	FKBP1B,PRNP,VCAM1,HOMER2	4/22
1_Member	GO Biological Processes	GO:0061756	leukocyte adhesion to vascular endothelial cell	-2.06613	-1.02185	2650,6401,6402,7412	GCNT1,SELE,SELL,VCAM1	4/22
1_Member	GO Biological Processes	GO:0086011	membrane repolarization during action potential	-2.06613	-1.02185	481,3764,3784,9992	ATP1B1,KCNJ8,KCNQ1,KCNE2	4/22
1_Member	GO Biological Processes	GO:1905517	macrophage migration	-2.06613	-1.02185	6288,6347,151647,284340	SAA1,CCL2,TAFA4,CXCL17	4/22
1_Member	GO Biological Processes	GO:2000831	regulation of steroid hormone secretion	-2.06613	-1.02185	1601,6696,51083,51738	DAB2,SPP1,GAL,GHRL	4/22
1_Member	Reactome Gene Sets	R-HSA-389977	Post-chaperonin tubulin folding pathway	-2.06613	-1.02185	1155,7277,7846,10381	TBCB,TUBA4A,TUBA1A,TUBB3	4/22
1_Member	WikiPathways	WP357	Fatty acid biosynthesis	-2.06613	-1.02185	2181,3033,10449,55902	ACSL3,HADH,ACAA2,ACSS2	4/22
1_Member	WikiPathways	WP4722	Glycerolipids and glycerophospholipids	-2.06613	-1.02185	1040,5319,55500,56994	CDS1,PLA2G1B,ETNK1,CHPT1	4/22
1_Member	KEGG Pathway	hsa00220	Arginine biosynthesis	-2.06613	-1.02185	2752,2805,2875,84706	GLUL,GOT1,GPT,GPT2	4/22
1_Member	GO Biological Processes	GO:0050954	sensory perception of mechanical stimulus	-2.06477	-1.02071	1277,1280,1301,1649,1687,2876,3249,3784,5205,5270,7852,9455,54532,153562	COL1A1,COL2A1,COL11A1,DDIT3,GSDME,GPX1,HPN,KCNQ1,ATP8B1,SERPINE2,CXCR4,HOMER2,USP53,MARVELD2	14/180
1_Member	GO Biological Processes	GO:0009620	response to fungus	-2.06193	-1.01841	1113,1673,4057,5919,6279,6280,50856	CHGA,DEFB4A,LTF,RARRES2,S100A8,S100A9,CLEC4A	7/62
1_Member	GO Biological Processes	GO:0032387	negative regulation of intracellular transport	-2.06193	-1.01841	580,3638,4131,11261,51715,120892,258010	BARD1,INSIG1,MAP1B,CHP1,RAB23,LRRK2,SVIP	7/62
1_Member	GO Biological Processes	GO:0007051	spindle organization	-2.06184	-1.01841	891,2316,4751,6491,9133,9787,10403,22974,29899,57405,83540,203068,259266	CCNB1,FLNA,NEK2,STIL,CCNB2,DLGAP5,NDC80,TPX2,GPSM2,SPC25,NUF2,TUBB,ASPM	13/162
1_Member	GO Biological Processes	GO:0003206	cardiac chamber morphogenesis	-2.05571	-1.01272	187,1301,1909,2296,2535,2626,2627,6423,6586,9353,9464	APLNR,COL11A1,EDNRA,FOXC1,FZD2,GATA4,GATA6,SFRP2,SLIT3,SLIT2,HAND2	11/127
1_Member	GO Biological Processes	GO:0003231	cardiac ventricle development	-2.05571	-1.01272	187,1301,1909,2296,2535,2626,3776,6423,6586,9353,9464	APLNR,COL11A1,EDNRA,FOXC1,FZD2,GATA4,KCNK2,SFRP2,SLIT3,SLIT2,HAND2	11/127
1_Member	GO Biological Processes	GO:0016052	carbohydrate catabolic process	-2.05489	-1.01233	229,2023,2524,2530,2582,3939,5214,5834,10690,27159	ALDOB,ENO1,FUT2,FUT8,GALE,LDHA,PFKP,PYGB,FUT9,CHIA	10/110
1_Member	GO Biological Processes	GO:0062207	regulation of pattern recognition receptor signaling pathway	-2.05489	-1.01233	929,2150,3304,4057,7098,7128,8638,27293,54209,55601	CD14,F2RL1,HSPA1B,LTF,TLR3,TNFAIP3,OASL,SMPDL3B,TREM2,DDX60	10/110
1_Member	GO Biological Processes	GO:0002673	regulation of acute inflammatory response	-2.04245	-1.00276	241,718,3569,5733,5743,388125	ALOX5AP,C3,IL6,PTGER3,PTGS2,C2CD4B	6/48
1_Member	GO Biological Processes	GO:0006094	gluconeogenesis	-2.04245	-1.00276	2023,2203,2805,3953,4190,8789	ENO1,FBP1,GOT1,LEPR,MDH1,FBP2	6/48
1_Member	GO Biological Processes	GO:0035094	response to nicotine	-2.04245	-1.00276	2876,3162,3775,3784,5179,7412	GPX1,HMOX1,KCNK1,KCNQ1,PENK,VCAM1	6/48
1_Member	GO Biological Processes	GO:0048675	axon extension	-2.04245	-1.00276	214,1909,4131,6586,9353,10371	ALCAM,EDNRA,MAP1B,SLIT3,SLIT2,SEMA3A	6/48
1_Member	GO Biological Processes	GO:1900271	regulation of long-term synaptic potentiation	-2.04245	-1.00276	348,5621,7305,10288,10590,51201	APOE,PRNP,TYROBP,LILRB2,SCGN,ZDHHC2	6/48
1_Member	Reactome Gene Sets	R-HSA-6806667	Metabolism of fat-soluble vitamins	-2.04245	-1.00276	348,1645,7276,8644,53630,57016	APOE,AKR1C1,TTR,AKR1C3,BCO1,AKR1B10	6/48
1_Member	GO Biological Processes	GO:0140013	meiotic nuclear division	-2.04053	-1.00276	898,994,1164,4603,7153,9133,9319,9985,10403,83540,84057,124817,259266	CCNE1,CDC25B,CKS2,MYBL1,TOP2A,CCNB2,TRIP13,REC8,NDC80,NUF2,MND1,CNTD1,ASPM	13/163
1_Member	Reactome Gene Sets	R-HSA-68886	M Phase	-2.03972	-1.00276	699,701,891,1058,1063,3014,3930,4751,5525,5579,5713,7277,7846,9133,10112,10381,10403,11004,11065,27338,29922,57405,83540,92421,113130,203068	BUB1,BUB1B,CCNB1,CENPA,CENPF,H2AX,LBR,NEK2,PPP2R5A,PRKCB,PSMD7,TUBA4A,TUBA1A,CCNB2,KIF20A,TUBB3,NDC80,KIF2C,UBE2C,UBE2S,NME7,SPC25,NUF2,CHMP4C,CDCA5,TUBB	26/417
1_Member	GO Biological Processes	GO:0006216	cytidine catabolic process	-2.03871	-1.00276	339,9582,10930	APOBEC1,APOBEC3B,APOBEC2	3/12
1_Member	GO Biological Processes	GO:0009972	cytidine deamination	-2.03871	-1.00276	339,9582,10930	APOBEC1,APOBEC3B,APOBEC2	3/12
1_Member	GO Biological Processes	GO:0010749	regulation of nitric oxide mediated signal transduction	-2.03871	-1.00276	2982,6690,7057	GUCY1A1,SPINK1,THBS1	3/12
1_Member	GO Biological Processes	GO:0033629	negative regulation of cell adhesion mediated by integrin	-2.03871	-1.00276	1545,5054,340485	CYP1B1,SERPINE1,ACER2	3/12
1_Member	GO Biological Processes	GO:0034135	regulation of toll-like receptor 2 signaling pathway	-2.03871	-1.00276	2150,7128,54209	F2RL1,TNFAIP3,TREM2	3/12
1_Member	GO Biological Processes	GO:0034145	positive regulation of toll-like receptor 4 signaling pathway	-2.03871	-1.00276	929,2150,4057	CD14,F2RL1,LTF	3/12
1_Member	GO Biological Processes	GO:0046087	cytidine metabolic process	-2.03871	-1.00276	339,9582,10930	APOBEC1,APOBEC3B,APOBEC2	3/12
1_Member	GO Biological Processes	GO:0051593	response to folic acid	-2.03871	-1.00276	2348,2876,7298	FOLR1,GPX1,TYMS	3/12
1_Member	GO Biological Processes	GO:0060026	convergent extension	-2.03871	-1.00276	2487,6423,10155	FRZB,SFRP2,TRIM28	3/12
1_Member	GO Biological Processes	GO:0060394	negative regulation of pathway-restricted SMAD protein phosphorylation	-2.03871	-1.00276	11117,26585,56937	EMILIN1,GREM1,PMEPA1	3/12
1_Member	GO Biological Processes	GO:0070254	mucus secretion	-2.03871	-1.00276	100,6338,10551	ADA,SCNN1B,AGR2	3/12
1_Member	GO Biological Processes	GO:0071493	cellular response to UV-B	-2.03871	-1.00276	3373,22861,51776	HYAL1,NLRP1,MAP3K20	3/12
1_Member	GO Biological Processes	GO:0072070	loop of Henle development	-2.03871	-1.00276	358,79191,153572	AQP1,IRX3,IRX2	3/12
1_Member	GO Biological Processes	GO:0090331	negative regulation of platelet aggregation	-2.03871	-1.00276	928,2266,5270	CD9,FGG,SERPINE2	3/12
1_Member	GO Biological Processes	GO:0097384	cellular lipid biosynthetic process	-2.03871	-1.00276	5191,56994,84188	PEX7,CHPT1,FAR1	3/12
1_Member	GO Biological Processes	GO:0140052	cellular response to oxidised low-density lipoprotein particle stimulus	-2.03871	-1.00276	54209,55512,84830	TREM2,SMPD3,ADTRP	3/12
1_Member	GO Biological Processes	GO:1901503	ether biosynthetic process	-2.03871	-1.00276	5191,56994,84188	PEX7,CHPT1,FAR1	3/12
1_Member	GO Biological Processes	GO:1901731	positive regulation of platelet aggregation	-2.03871	-1.00276	3569,11117,84034	IL6,EMILIN1,EMILIN2	3/12
1_Member	Reactome Gene Sets	R-HSA-1475029	Reversible hydration of carbon dioxide	-2.03871	-1.00276	760,762,768	CA2,CA4,CA9	3/12
1_Member	Reactome Gene Sets	R-HSA-2160916	Hyaluronan uptake and degradation	-2.03871	-1.00276	960,3373,11261	CD44,HYAL1,CHP1	3/12
1_Member	Reactome Gene Sets	R-HSA-430116	GP1b-IX-V activation signalling	-2.03871	-1.00276	1277,1278,2316	COL1A1,COL1A2,FLNA	3/12
1_Member	WikiPathways	WP3871	Valproic acid pathway	-2.03871	-1.00276	36,1559,1962	ACADSB,CYP2C9,EHHADH	3/12
1_Member	WikiPathways	WP4292	Methionine metabolism leading to sulfur amino acids and related disorders	-2.03871	-1.00276	635,1491,27232	BHMT,CTH,GNMT	3/12
1_Member	GO Biological Processes	GO:0032720	negative regulation of tumor necrosis factor production	-2.03802	-1.00248	3479,5004,7128,7291,10457,50856,51738,54209	IGF1,ORM1,TNFAIP3,TWIST1,GPNMB,CLEC4A,GHRL,TREM2	8/78
1_Member	GO Biological Processes	GO:0055117	regulation of cardiac muscle contraction	-2.03802	-1.00248	481,1113,1824,1829,2281,2626,3784,5142	ATP1B1,CHGA,DSC2,DSG2,FKBP1B,GATA4,KCNQ1,PDE4B	8/78
1_Member	GO Biological Processes	GO:0006874	intracellular calcium ion homeostasis	-2.03509	-0.999821	309,348,481,1816,1909,2281,2852,5579,6355,7052,7504,9104,10590,55013,84239	ANXA6,APOE,ATP1B1,DRD5,EDNRA,FKBP1B,GPER1,PRKCB,CCL8,TGM2,XK,RGN,SCGN,MCUB,ATP13A4	15/200
1_Member	GO Biological Processes	GO:0060537	muscle tissue development	-2.03493	-0.999821	1281,1301,1525,1829,1909,2296,2626,2627,2697,2876,3679,4223,4638,6840,7504,10052,26585,56999,64091,64208,79191,92737	COL3A1,COL11A1,CXADR,DSG2,EDNRA,FOXC1,GATA4,GATA6,GJA1,GPX1,ITGA7,MEOX2,MYLK,SVIL,XK,GJC1,GREM1,ADAMTS9,POPDC2,POPDC3,IRX3,DNER	22/336
1_Member	GO Biological Processes	GO:0050821	protein stabilization	-2.03129	-0.996389	481,483,2316,3304,3479,5202,5216,7203,7305,9349,9532,10103,11261,23560,23673,64175	ATP1B1,ATP1B3,FLNA,HSPA1B,IGF1,PFDN2,PFN1,CCT3,TYROBP,RPL23,BAG2,TSPAN1,CHP1,GTPBP4,STX12,P3H1	16/219
1_Member	GO Biological Processes	GO:1903706	regulation of hemopoiesis	-2.02716	-0.992468	100,301,604,714,2200,3304,3624,4057,4192,4211,4609,4982,6935,7098,7130,7305,9308,9636,9935,10234,10288,10875,11221,51208,54209,85477	ADA,ANXA1,BCL6,C1QC,FBN1,HSPA1B,INHBA,LTF,MDK,MEIS1,MYC,TNFRSF11B,ZEB1,TLR3,TNFAIP6,TYROBP,CD83,ISG15,MAFB,LRRC17,LILRB2,FGL2,DUSP10,CLDN18,TREM2,SCIN	26/418
1_Member	GO Biological Processes	GO:0032663	regulation of interleukin-2 production	-2.02479	-0.990925	301,5142,5621,7128,7805,9308,9455	ANXA1,PDE4B,PRNP,TNFAIP3,LAPTM5,CD83,HOMER2	7/63
1_Member	GO Biological Processes	GO:0042490	mechanoreceptor differentiation	-2.02479	-0.990925	1687,2535,3784,5205,5357,80736,115908	GSDME,FZD2,KCNQ1,ATP8B1,PLS1,SLC44A4,CTHRC1	7/63
1_Member	GO Biological Processes	GO:0070542	response to fatty acid	-2.02479	-0.990925	210,1645,1646,3158,5743,8644,9076	ALAD,AKR1C1,AKR1C2,HMGCS2,PTGS2,AKR1C3,CLDN1	7/63
1_Member	GO Biological Processes	GO:1903046	meiotic cell cycle process	-2.02477	-0.990925	898,994,1164,1909,4603,7153,9133,9319,9985,10403,83540,84057,124817,259266	CCNE1,CDC25B,CKS2,EDNRA,MYBL1,TOP2A,CCNB2,TRIP13,REC8,NDC80,NUF2,MND1,CNTD1,ASPM	14/182
1_Member	GO Biological Processes	GO:0030177	positive regulation of Wnt signaling pathway	-2.02079	-0.987154	1001,1277,1601,3087,6423,6424,7128,23213,55959,84870,120892,259266	CDH3,COL1A1,DAB2,HHEX,SFRP2,SFRP4,TNFAIP3,SULF1,SULF2,RSPO3,LRRK2,ASPM	12/146
1_Member	GO Biological Processes	GO:0010923	negative regulation of phosphatase activity	-2.01608	-0.983913	2281,2771,9104,11261,145376	FKBP1B,GNAI2,RGN,CHP1,PPP1R36	5/35
1_Member	GO Biological Processes	GO:0021988	olfactory lobe development	-2.01608	-0.983913	9353,9928,10371,120892,170302	SLIT2,KIF14,SEMA3A,LRRK2,ARX	5/35
1_Member	GO Biological Processes	GO:0050974	detection of mechanical stimulus involved in sensory perception	-2.01608	-0.983913	1301,3249,3784,5270,7852	COL11A1,HPN,KCNQ1,SERPINE2,CXCR4	5/35
1_Member	GO Biological Processes	GO:0071398	cellular response to fatty acid	-2.01608	-0.983913	1645,1646,3158,8644,9076	AKR1C1,AKR1C2,HMGCS2,AKR1C3,CLDN1	5/35
1_Member	Reactome Gene Sets	R-HSA-114604	GPVI-mediated activation cascade	-2.01608	-0.983913	1277,1278,2207,3937,10451	COL1A1,COL1A2,FCER1G,LCP2,VAV3	5/35
1_Member	Reactome Gene Sets	R-HSA-1296065	Inwardly rectifying K+ channels	-2.01608	-0.983913	3764,3767,3772,3773,59345	KCNJ8,KCNJ11,KCNJ15,KCNJ16,GNB4	5/35
1_Member	KEGG Pathway	hsa00040	Pentose and glucuronate interconversions	-2.01608	-0.983913	7366,9365,51181,57016,729920	UGT2B15,KL,DCXR,AKR1B10,CRPPA	5/35
1_Member	GO Biological Processes	GO:0051928	positive regulation of calcium ion transport	-2.00719	-0.975235	187,481,2852,3627,4283,4638,5319,6347,7070,9104,9992	APLNR,ATP1B1,GPER1,CXCL10,CXCL9,MYLK,PLA2G1B,CCL2,THY1,RGN,KCNE2	11/129
1_Member	GO Biological Processes	GO:1990138	neuron projection extension	-2.00585	-0.974731	214,1909,4131,6456,6586,9353,10371,23767	ALCAM,EDNRA,MAP1B,SH3GL2,SLIT3,SLIT2,SEMA3A,FLRT3	8/79
1_Member	Canonical Pathways	M66	PID MYC ACTIV PATHWAY	-2.00585	-0.974731	891,894,1871,2023,3939,4318,4609,5274	CCNB1,CCND2,E2F3,ENO1,LDHA,MMP9,MYC,SERPINI1	8/79
1_Member	Reactome Gene Sets	R-HSA-9662851	Anti-inflammatory response favouring Leishmania parasite infection	-2.00585	-0.974731	136,2214,2771,3055,3569,5567,9332,59345	ADORA2B,FCGR3A,GNAI2,HCK,IL6,PRKACB,CD163,GNB4	8/79
1_Member	Reactome Gene Sets	R-HSA-9664433	Leishmania parasite growth and survival	-2.00585	-0.974731	136,2214,2771,3055,3569,5567,9332,59345	ADORA2B,FCGR3A,GNAI2,HCK,IL6,PRKACB,CD163,GNB4	8/79
1_Member	GO Biological Processes	GO:0048736	appendage development	-2.00506	-0.974359	1280,1281,1311,4223,5125,5396,6423,7291,9464,10979,26585,51776,91461,116039	COL2A1,COL3A1,COMP,MEOX2,PCSK5,PRRX1,SFRP2,TWIST1,HAND2,FERMT2,GREM1,MAP3K20,PKDCC,OSR2	14/183
1_Member	GO Biological Processes	GO:0060173	limb development	-2.00506	-0.974359	1280,1281,1311,4223,5125,5396,6423,7291,9464,10979,26585,51776,91461,116039	COL2A1,COL3A1,COMP,MEOX2,PCSK5,PRRX1,SFRP2,TWIST1,HAND2,FERMT2,GREM1,MAP3K20,PKDCC,OSR2	14/183
1_Member	GO Biological Processes	GO:0006941	striated muscle contraction	-2.00227	-0.97198	481,2697,3764,3784,7852,9992,10052,23171,23327,23676	ATP1B1,GJA1,KCNJ8,KCNQ1,CXCR4,KCNE2,GJC1,GPD1L,NEDD4L,SMPX	10/112
1_Member	GO Biological Processes	GO:1905954	positive regulation of lipid localization	-2.00227	-0.97198	348,718,1601,4481,6696,8399,51083,51738,54209,440503	APOE,C3,DAB2,MSR1,SPP1,PLA2G10,GAL,GHRL,TREM2,PLIN5	10/112
2_Summary	Canonical Pathways	M5884	NABA CORE MATRISOME	-33.4046	-29.056	165,633,1277,1278,1280,1281,1282,1284,1289,1290,1293,1300,1301,1303,1307,1308,1311,1462,1842,2200,2243,2244,2266,2335,3371,3483,3485,3487,3490,4053,4054,4060,4256,4958,5552,6586,6678,6695,6696,7045,7057,7058,7060,7130,7837,8483,9353,10875,11117,22795,25878,25890,27286,54829,55203,59277,64094,79875,80781,83690,83872,84034,84624,84870,115908,256076	AEBP1,BGN,COL1A1,COL1A2,COL2A1,COL3A1,COL4A1,COL4A2,COL5A1,COL5A2,COL6A3,COL10A1,COL11A1,COL12A1,COL16A1,COL17A1,COMP,VCAN,ECM2,FBN1,FGA,FGB,FGG,FN1,TNC,IGFALS,IGFBP2,IGFBP4,IGFBP7,LTBP2,LTBP3,LUM,MGP,OMD,SRGN,SLIT3,SPARC,SPOCK1,SPP1,TGFBI,THBS1,THBS2,THBS4,TNFAIP6,PXDN,CILP,SLIT2,FGL2,EMILIN1,NID2,MXRA5,ABI3BP,SRPX2,ASPN,LGI2,NTN4,SMOC2,THSD4,COL18A1,CRISPLD1,HMCN1,EMILIN2,FNDC1,RSPO3,CTHRC1,COL…	66/-
2_Member	Canonical Pathways	M5884	NABA CORE MATRISOME	-33.4046	-29.056	165,633,1277,1278,1280,1281,1282,1284,1289,1290,1293,1300,1301,1303,1307,1308,1311,1462,1842,2200,2243,2244,2266,2335,3371,3483,3485,3487,3490,4053,4054,4060,4256,4958,5552,6586,6678,6695,6696,7045,7057,7058,7060,7130,7837,8483,9353,10875,11117,22795,25878,25890,27286,54829,55203,59277,64094,79875,80781,83690,83872,84034,84624,84870,115908,256076	AEBP1,BGN,COL1A1,COL1A2,COL2A1,COL3A1,COL4A1,COL4A2,COL5A1,COL5A2,COL6A3,COL10A1,COL11A1,COL12A1,COL16A1,COL17A1,COMP,VCAN,ECM2,FBN1,FGA,FGB,FGG,FN1,TNC,IGFALS,IGFBP2,IGFBP4,IGFBP7,LTBP2,LTBP3,LUM,MGP,OMD,SRGN,SLIT3,SPARC,SPOCK1,SPP1,TGFBI,THBS1,THBS2,THBS4,TNFAIP6,PXDN,CILP,SLIT2,FGL2,EMILIN1,NID2,MXRA5,ABI3BP,SRPX2,ASPN,LGI2,NTN4,SMOC2,THSD4,COL18A1,CRISPLD1,HMCN1,EMILIN2,FNDC1,RSPO3,CTHRC1,COL…	66/275
2_Member	Canonical Pathways	M3008	NABA ECM GLYCOPROTEINS	-20.3085	-16.96	165,1311,1842,2200,2243,2244,2266,2335,3371,3483,3485,3487,3490,4053,4054,4256,6586,6678,6696,7045,7057,7058,7060,7130,7837,8483,9353,10875,11117,22795,25878,25890,27286,55203,59277,64094,79875,83690,83872,84034,84624,84870,115908	AEBP1,COMP,ECM2,FBN1,FGA,FGB,FGG,FN1,TNC,IGFALS,IGFBP2,IGFBP4,IGFBP7,LTBP2,LTBP3,MGP,SLIT3,SPARC,SPP1,TGFBI,THBS1,THBS2,THBS4,TNFAIP6,PXDN,CILP,SLIT2,FGL2,EMILIN1,NID2,MXRA5,ABI3BP,SRPX2,LGI2,NTN4,SMOC2,THSD4,CRISPLD1,HMCN1,EMILIN2,FNDC1,RSPO3,CTHRC1	43/196
3_Summary	Reactome Gene Sets	R-HSA-1474244	Extracellular matrix organization	-29.2194	-25.1719	87,633,871,960,999,1277,1278,1280,1281,1282,1284,1289,1290,1293,1300,1301,1303,1307,1308,1311,1462,1508,1513,1514,2200,2243,2244,2266,2335,3371,3383,3672,3679,3689,4016,4053,4054,4060,4316,4318,4321,5054,5654,6678,6696,7057,7076,7077,7276,7412,7837,9507,10753,11117,22795,54829,56999,59277,64175,80781,84034,92291,256076,388743,333,1545,1842,2296,2620,3249,4982,5268,6423,7045,23213,25890,25903,2658…	ACTN1,BGN,SERPINH1,CD44,CDH1,COL1A1,COL1A2,COL2A1,COL3A1,COL4A1,COL4A2,COL5A1,COL5A2,COL6A3,COL10A1,COL11A1,COL12A1,COL16A1,COL17A1,COMP,VCAN,CTSB,CTSK,CTSL,FBN1,FGA,FGB,FGG,FN1,TNC,ICAM1,ITGA1,ITGA7,ITGB2,LOXL1,LTBP2,LTBP3,LUM,MMP7,MMP9,MMP12,SERPINE1,HTRA1,SPARC,SPP1,THBS1,TIMP1,TIMP2,TTR,VCAM1,PXDN,ADAMTS4,CAPN9,EMILIN1,NID2,ASPN,ADAMTS9,NTN4,P3H1,COL18A1,EMILIN2,CAPN13,COL6A5,CAPN8,APLP1,CYP1…	104/-
3_Member	Reactome Gene Sets	R-HSA-1474244	Extracellular matrix organization	-29.2194	-25.1719	87,633,871,960,999,1277,1278,1280,1281,1282,1284,1289,1290,1293,1300,1301,1303,1307,1308,1311,1462,1508,1513,1514,2200,2243,2244,2266,2335,3371,3383,3672,3679,3689,4016,4053,4054,4060,4316,4318,4321,5054,5654,6678,6696,7057,7076,7077,7276,7412,7837,9507,10753,11117,22795,54829,56999,59277,64175,80781,84034,92291,256076,388743	ACTN1,BGN,SERPINH1,CD44,CDH1,COL1A1,COL1A2,COL2A1,COL3A1,COL4A1,COL4A2,COL5A1,COL5A2,COL6A3,COL10A1,COL11A1,COL12A1,COL16A1,COL17A1,COMP,VCAN,CTSB,CTSK,CTSL,FBN1,FGA,FGB,FGG,FN1,TNC,ICAM1,ITGA1,ITGA7,ITGB2,LOXL1,LTBP2,LTBP3,LUM,MMP7,MMP9,MMP12,SERPINE1,HTRA1,SPARC,SPP1,THBS1,TIMP1,TIMP2,TTR,VCAM1,PXDN,ADAMTS4,CAPN9,EMILIN1,NID2,ASPN,ADAMTS9,NTN4,P3H1,COL18A1,EMILIN2,CAPN13,COL6A5,CAPN8	64/300
3_Member	GO Biological Processes	GO:0030198	extracellular matrix organization	-19.1575	-15.8881	333,871,1277,1278,1280,1281,1282,1284,1289,1290,1300,1301,1303,1307,1308,1311,1513,1545,1842,2296,2620,3249,4016,4060,4316,4318,4321,4982,5268,6423,7045,7837,9507,11117,22795,23213,25890,25903,26585,55512,55959,56999,59277,60681,64094,79875,80781,83872,151887	APLP1,SERPINH1,COL1A1,COL1A2,COL2A1,COL3A1,COL4A1,COL4A2,COL5A1,COL5A2,COL10A1,COL11A1,COL12A1,COL16A1,COL17A1,COMP,CTSK,CYP1B1,ECM2,FOXC1,GAS2,HPN,LOXL1,LUM,MMP7,MMP9,MMP12,TNFRSF11B,SERPINB5,SFRP2,TGFBI,PXDN,ADAMTS4,EMILIN1,NID2,SULF1,ABI3BP,OLFML2B,GREM1,SMPD3,SULF2,ADAMTS9,NTN4,FKBP10,SMOC2,THSD4,COL18A1,HMCN1,CCDC80	49/272
3_Member	GO Biological Processes	GO:0043062	extracellular structure organization	-19.0873	-15.8527	333,871,1277,1278,1280,1281,1282,1284,1289,1290,1300,1301,1303,1307,1308,1311,1513,1545,1842,2296,2620,3249,4016,4060,4316,4318,4321,4982,5268,6423,7045,7837,9507,11117,22795,23213,25890,25903,26585,55512,55959,56999,59277,60681,64094,79875,80781,83872,151887	APLP1,SERPINH1,COL1A1,COL1A2,COL2A1,COL3A1,COL4A1,COL4A2,COL5A1,COL5A2,COL10A1,COL11A1,COL12A1,COL16A1,COL17A1,COMP,CTSK,CYP1B1,ECM2,FOXC1,GAS2,HPN,LOXL1,LUM,MMP7,MMP9,MMP12,TNFRSF11B,SERPINB5,SFRP2,TGFBI,PXDN,ADAMTS4,EMILIN1,NID2,SULF1,ABI3BP,OLFML2B,GREM1,SMPD3,SULF2,ADAMTS9,NTN4,FKBP10,SMOC2,THSD4,COL18A1,HMCN1,CCDC80	49/273
3_Member	GO Biological Processes	GO:0045229	external encapsulating structure organization	-18.948	-15.7455	333,871,1277,1278,1280,1281,1282,1284,1289,1290,1300,1301,1303,1307,1308,1311,1513,1545,1842,2296,2620,3249,4016,4060,4316,4318,4321,4982,5268,6423,7045,7837,9507,11117,22795,23213,25890,25903,26585,55512,55959,56999,59277,60681,64094,79875,80781,83872,151887	APLP1,SERPINH1,COL1A1,COL1A2,COL2A1,COL3A1,COL4A1,COL4A2,COL5A1,COL5A2,COL10A1,COL11A1,COL12A1,COL16A1,COL17A1,COMP,CTSK,CYP1B1,ECM2,FOXC1,GAS2,HPN,LOXL1,LUM,MMP7,MMP9,MMP12,TNFRSF11B,SERPINB5,SFRP2,TGFBI,PXDN,ADAMTS4,EMILIN1,NID2,SULF1,ABI3BP,OLFML2B,GREM1,SMPD3,SULF2,ADAMTS9,NTN4,FKBP10,SMOC2,THSD4,COL18A1,HMCN1,CCDC80	49/275
3_Member	Reactome Gene Sets	R-HSA-1474228	Degradation of the extracellular matrix	-18.5976	-15.4251	960,999,1277,1278,1280,1281,1282,1284,1289,1290,1293,1300,1301,1303,1307,1308,1508,1513,1514,2200,2335,4316,4318,4321,5654,6696,7076,7077,9507,10753,56999,80781,92291,256076,388743	CD44,CDH1,COL1A1,COL1A2,COL2A1,COL3A1,COL4A1,COL4A2,COL5A1,COL5A2,COL6A3,COL10A1,COL11A1,COL12A1,COL16A1,COL17A1,CTSB,CTSK,CTSL,FBN1,FN1,MMP7,MMP9,MMP12,HTRA1,SPP1,TIMP1,TIMP2,ADAMTS4,CAPN9,ADAMTS9,COL18A1,CAPN13,COL6A5,CAPN8	35/140
3_Member	Reactome Gene Sets	R-HSA-1442490	Collagen degradation	-15.1433	-12.3629	1277,1278,1280,1281,1282,1284,1289,1290,1293,1300,1301,1303,1307,1308,1508,1513,1514,4316,4318,4321,80781,256076	COL1A1,COL1A2,COL2A1,COL3A1,COL4A1,COL4A2,COL5A1,COL5A2,COL6A3,COL10A1,COL11A1,COL12A1,COL16A1,COL17A1,CTSB,CTSK,CTSL,MMP7,MMP9,MMP12,COL18A1,COL6A5	22/64
3_Member	Reactome Gene Sets	R-HSA-2022090	Assembly of collagen fibrils and other multimeric structures	-14.4999	-11.7641	1277,1278,1280,1281,1282,1284,1289,1290,1293,1300,1301,1303,1308,1508,1514,4016,4316,4318,7837,80781,256076	COL1A1,COL1A2,COL2A1,COL3A1,COL4A1,COL4A2,COL5A1,COL5A2,COL6A3,COL10A1,COL11A1,COL12A1,COL17A1,CTSB,CTSL,LOXL1,MMP7,MMP9,PXDN,COL18A1,COL6A5	21/61
3_Member	Reactome Gene Sets	R-HSA-1474290	Collagen formation	-13.6452	-11.0126	871,1277,1278,1280,1281,1282,1284,1289,1290,1293,1300,1301,1303,1307,1308,1508,1514,4016,4316,4318,7837,64175,80781,256076	SERPINH1,COL1A1,COL1A2,COL2A1,COL3A1,COL4A1,COL4A2,COL5A1,COL5A2,COL6A3,COL10A1,COL11A1,COL12A1,COL16A1,COL17A1,CTSB,CTSL,LOXL1,MMP7,MMP9,PXDN,P3H1,COL18A1,COL6A5	24/90
3_Member	GO Biological Processes	GO:0030199	collagen fibril organization	-12.7308	-10.1829	871,1277,1278,1280,1281,1289,1290,1301,1303,1311,1545,2296,4016,4060,6423,7837,26585,60681,80781	SERPINH1,COL1A1,COL1A2,COL2A1,COL3A1,COL5A1,COL5A2,COL11A1,COL12A1,COMP,CYP1B1,FOXC1,LOXL1,LUM,SFRP2,PXDN,GREM1,FKBP10,COL18A1	19/58
3_Member	KEGG Pathway	hsa04974	Protein digestion and absorption	-12.2408	-9.7617	481,483,1277,1278,1280,1281,1282,1284,1289,1290,1293,1300,1301,1303,1307,1308,1358,1360,3769,3784,9056,80781,117247,256076	ATP1B1,ATP1B3,COL1A1,COL1A2,COL2A1,COL3A1,COL4A1,COL4A2,COL5A1,COL5A2,COL6A3,COL10A1,COL11A1,COL12A1,COL16A1,COL17A1,CPA2,CPB1,KCNJ13,KCNQ1,SLC7A7,COL18A1,SLC16A10,COL6A5	24/103
3_Member	Canonical Pathways	M3005	NABA COLLAGENS	-11.6252	-9.22607	1277,1278,1280,1281,1282,1284,1289,1290,1293,1300,1301,1303,1307,1308,80781,256076	COL1A1,COL1A2,COL2A1,COL3A1,COL4A1,COL4A2,COL5A1,COL5A2,COL6A3,COL10A1,COL11A1,COL12A1,COL16A1,COL17A1,COL18A1,COL6A5	16/44
3_Member	Reactome Gene Sets	R-HSA-8948216	Collagen chain trimerization	-11.6252	-9.22607	1277,1278,1280,1281,1282,1284,1289,1290,1293,1300,1301,1303,1307,1308,80781,256076	COL1A1,COL1A2,COL2A1,COL3A1,COL4A1,COL4A2,COL5A1,COL5A2,COL6A3,COL10A1,COL11A1,COL12A1,COL16A1,COL17A1,COL18A1,COL6A5	16/44
3_Member	Reactome Gene Sets	R-HSA-3000178	ECM proteoglycans	-11.366	-8.99971	633,1277,1278,1280,1281,1282,1284,1289,1290,1293,1311,1462,2335,3371,3679,4060,5054,6678,54829,256076	BGN,COL1A1,COL1A2,COL2A1,COL3A1,COL4A1,COL4A2,COL5A1,COL5A2,COL6A3,COMP,VCAN,FN1,TNC,ITGA7,LUM,SERPINE1,SPARC,ASPN,COL6A5	20/76
3_Member	Reactome Gene Sets	R-HSA-1650814	Collagen biosynthesis and modifying enzymes	-10.4601	-8.20846	871,1277,1278,1280,1281,1282,1284,1289,1290,1293,1300,1301,1303,1307,1308,64175,80781,256076	SERPINH1,COL1A1,COL1A2,COL2A1,COL3A1,COL4A1,COL4A2,COL5A1,COL5A2,COL6A3,COL10A1,COL11A1,COL12A1,COL16A1,COL17A1,P3H1,COL18A1,COL6A5	18/67
3_Member	Canonical Pathways	M198	PID SYNDECAN 1 PATHWAY	-10.1523	-7.92757	1277,1278,1280,1281,1282,1289,1290,1293,1300,1301,1303,1307,1308,4316,4318	COL1A1,COL1A2,COL2A1,COL3A1,COL4A1,COL5A1,COL5A2,COL6A3,COL10A1,COL11A1,COL12A1,COL16A1,COL17A1,MMP7,MMP9	15/46
3_Member	Reactome Gene Sets	R-HSA-3000171	Non-integrin membrane-ECM interactions	-9.43645	-7.28379	87,1277,1278,1280,1281,1282,1284,1289,1290,1300,1301,2335,3371,7057,7276,59277	ACTN1,COL1A1,COL1A2,COL2A1,COL3A1,COL4A1,COL4A2,COL5A1,COL5A2,COL10A1,COL11A1,FN1,TNC,THBS1,TTR,NTN4	16/59
3_Member	Canonical Pathways	M160	PID AVB3 INTEGRIN PATHWAY	-8.76337	-6.67489	1277,1278,1280,1281,1282,1289,1290,1293,1300,1301,1303,1307,1308,2335,6696,10451,27329	COL1A1,COL1A2,COL2A1,COL3A1,COL4A1,COL5A1,COL5A2,COL6A3,COL10A1,COL11A1,COL12A1,COL16A1,COL17A1,FN1,SPP1,VAV3,ANGPTL3	17/74
3_Member	Reactome Gene Sets	R-HSA-186797	Signaling by PDGF	-8.57237	-6.49098	1280,1281,1282,1284,1289,1290,1293,5782,6696,6776,7057,7058,7060,80310,256076	COL2A1,COL3A1,COL4A1,COL4A2,COL5A1,COL5A2,COL6A3,PTPN12,SPP1,STAT5A,THBS1,THBS2,THBS4,PDGFD,COL6A5	15/58
3_Member	WikiPathways	WP3967	miR-509-3p alteration of YAP1/ECM axis	-6.89997	-5.00626	1277,1281,1289,1909,2335,6678,7058,7291	COL1A1,COL3A1,COL5A1,EDNRA,FN1,SPARC,THBS2,TWIST1	8/18
3_Member	Reactome Gene Sets	R-HSA-3000170	Syndecan interactions	-6.41651	-4.5917	87,1277,1278,1281,1289,1290,2335,3371,7057	ACTN1,COL1A1,COL1A2,COL3A1,COL5A1,COL5A2,FN1,TNC,THBS1	9/27
3_Member	WikiPathways	WP2911	miRNA targets in ECM and membrane receptors	-6.39625	-4.57789	1278,1281,1282,1284,1289,1290,1293,2335,3672,7057,7058	COL1A2,COL3A1,COL4A1,COL4A2,COL5A1,COL5A2,COL6A3,FN1,ITGA1,THBS1,THBS2	11/43
3_Member	Reactome Gene Sets	R-HSA-8874081	MET activates PTK2 signaling	-4.94919	-3.33623	1277,1278,1280,1281,1289,1290,1301,2335	COL1A1,COL1A2,COL2A1,COL3A1,COL5A1,COL5A2,COL11A1,FN1	8/30
3_Member	Reactome Gene Sets	R-HSA-419037	NCAM1 interactions	-4.65968	-3.08782	1280,1281,1282,1284,1289,1290,1293,5621,256076	COL2A1,COL3A1,COL4A1,COL4A2,COL5A1,COL5A2,COL6A3,PRNP,COL6A5	9/42
3_Member	Reactome Gene Sets	R-HSA-8875878	MET promotes cell motility	-3.89638	-2.45477	1277,1278,1280,1281,1289,1290,1301,2335	COL1A1,COL1A2,COL2A1,COL3A1,COL5A1,COL5A2,COL11A1,FN1	8/41
3_Member	Reactome Gene Sets	R-HSA-375165	NCAM signaling for neurite out-growth	-3.24263	-1.93861	1280,1281,1282,1284,1289,1290,1293,5621,256076	COL2A1,COL3A1,COL4A1,COL4A2,COL5A1,COL5A2,COL6A3,PRNP,COL6A5	9/63
3_Member	Reactome Gene Sets	R-HSA-6806834	Signaling by MET	-3.11466	-1.83317	1277,1278,1280,1281,1289,1290,1301,2335,3249,6456	COL1A1,COL1A2,COL2A1,COL3A1,COL5A1,COL5A2,COL11A1,FN1,HPN,SH3GL2	10/79
3_Member	WikiPathways	WP453	Inflammatory response pathway	-2.30637	-1.20583	1277,1278,1281,2335,7057	COL1A1,COL1A2,COL3A1,FN1,THBS1	5/30
4_Summary	GO Biological Processes	GO:0048871	multicellular organismal-level homeostasis	-23.3195	-19.4481	12,33,100,154,216,301,355,358,361,563,580,604,608,1000,1001,1182,1280,1281,1311,1513,1525,1880,2296,2327,2329,2651,2697,2876,3162,3171,3216,3315,3493,3512,3569,3624,3784,3953,4057,4588,5142,5284,5320,5567,5743,6337,6338,6340,6456,6558,7031,7032,7036,7128,7291,7846,8399,9076,9133,9153,9447,9545,10673,10874,11167,23554,29887,55646,55808,57333,64081,79191,79888,83690,112609,139818,145226,148811,2222…	SERPINA3,ACADL,ADA,ADRB2,ALDH1A1,ANXA1,FAS,AQP1,AQP4,AZGP1,BARD1,BCL6,TNFRSF17,CDH2,CDH3,CLCN3,COL2A1,COL3A1,COMP,CTSK,CXADR,GPR183,FOXC1,FMO2,FMO4,GCNT2,GJA1,GPX1,HMOX1,FOXA3,HOXB6,HSPB1,IGHA1,JCHAIN,IL6,INHBA,KCNQ1,LEPR,LTF,MUC6,PDE4B,PIGR,PLA2G2A,PRKACB,PTGS2,SCNN1A,SCNN1B,SCNN1G,SH3GL2,SLC12A2,TFF1,TFF2,TFR2,TNFAIP3,TWIST1,TUBA1A,PLA2G10,CLDN1,CCNB2,SLC28A2,AIM2,RAB3D,TNFSF13B,NMU,FSTL1,TSPAN…	81/-
4_Member	GO Biological Processes	GO:0048871	multicellular organismal-level homeostasis	-23.3195	-19.4481	12,33,100,154,216,301,355,358,361,563,580,604,608,1000,1001,1182,1280,1281,1311,1513,1525,1880,2296,2327,2329,2651,2697,2876,3162,3171,3216,3315,3493,3512,3569,3624,3784,3953,4057,4588,5142,5284,5320,5567,5743,6337,6338,6340,6456,6558,7031,7032,7036,7128,7291,7846,8399,9076,9133,9153,9447,9545,10673,10874,11167,23554,29887,55646,55808,57333,64081,79191,79888,83690,112609,139818,145226,148811,2222…	SERPINA3,ACADL,ADA,ADRB2,ALDH1A1,ANXA1,FAS,AQP1,AQP4,AZGP1,BARD1,BCL6,TNFRSF17,CDH2,CDH3,CLCN3,COL2A1,COL3A1,COMP,CTSK,CXADR,GPR183,FOXC1,FMO2,FMO4,GCNT2,GJA1,GPX1,HMOX1,FOXA3,HOXB6,HSPB1,IGHA1,JCHAIN,IL6,INHBA,KCNQ1,LEPR,LTF,MUC6,PDE4B,PIGR,PLA2G2A,PRKACB,PTGS2,SCNN1A,SCNN1B,SCNN1G,SH3GL2,SLC12A2,TFF1,TFF2,TFR2,TNFAIP3,TWIST1,TUBA1A,PLA2G10,CLDN1,CCNB2,SLC28A2,AIM2,RAB3D,TNFSF13B,NMU,FSTL1,TSPAN…	81/587
4_Member	GO Biological Processes	GO:0001894	tissue homeostasis	-12.7253	-10.1829	12,154,216,563,580,1001,1182,1280,1281,1311,1513,1525,2296,2651,2697,3315,3493,3512,3569,4057,4588,5284,5743,6456,6558,7031,7032,7846,9076,9153,9545,23554,29887,64081,145226,340547,100506658	SERPINA3,ADRB2,ALDH1A1,AZGP1,BARD1,CDH3,CLCN3,COL2A1,COL3A1,COMP,CTSK,CXADR,FOXC1,GCNT2,GJA1,HSPB1,IGHA1,JCHAIN,IL6,LTF,MUC6,PIGR,PTGS2,SH3GL2,SLC12A2,TFF1,TFF2,TUBA1A,CLDN1,SLC28A2,RAB3D,TSPAN12,SNX10,PBLD,RDH12,VSIG1,OCLN	37/235
4_Member	GO Biological Processes	GO:0060249	anatomical structure homeostasis	-12.7253	-10.1829	12,154,216,563,580,1001,1182,1280,1281,1311,1513,1525,2296,2651,2697,3315,3493,3512,3569,4057,4588,5284,5743,6456,6558,7031,7032,7846,9076,9153,9545,23554,29887,64081,145226,340547,100506658	SERPINA3,ADRB2,ALDH1A1,AZGP1,BARD1,CDH3,CLCN3,COL2A1,COL3A1,COMP,CTSK,CXADR,FOXC1,GCNT2,GJA1,HSPB1,IGHA1,JCHAIN,IL6,LTF,MUC6,PIGR,PTGS2,SH3GL2,SLC12A2,TFF1,TFF2,TUBA1A,CLDN1,SLC28A2,RAB3D,TSPAN12,SNX10,PBLD,RDH12,VSIG1,OCLN	37/235
4_Member	GO Biological Processes	GO:0001895	retina homeostasis	-3.02884	-1.76858	563,1001,1182,3315,3493,3512,4057,5284,9153,145226	AZGP1,CDH3,CLCN3,HSPB1,IGHA1,JCHAIN,LTF,PIGR,SLC28A2,RDH12	10/81
5_Summary	GO Biological Processes	GO:0009410	response to xenobiotic stimulus	-23.1796	-19.4331	9,13,100,210,218,495,768,999,1001,1063,1277,1536,1545,1558,1559,1562,1577,1645,1728,2203,2327,2329,2330,2626,2627,2876,2938,2939,2941,3033,3158,3162,3485,3624,3767,3784,4131,4192,4609,4760,4837,4982,5019,5142,5621,5743,6097,6338,6423,6506,6750,6822,7057,7098,7298,7345,7366,7424,7852,9153,9447,9992,10057,10451,27284,29785,51083,340485,126,131,216,4128,5740,6819,22977,55902,91703,124975,246181,3290…	NAT1,AADAC,ADA,ALAD,ALDH3A1,ATP4A,CA9,CDH1,CDH3,CENPF,COL1A1,CYBB,CYP1B1,CYP2C8,CYP2C9,CYP2C18,CYP3A5,AKR1C1,NQO1,FBP1,FMO2,FMO4,FMO5,GATA4,GATA6,GPX1,GSTA1,GSTA2,GSTA4,HADH,HMGCS2,HMOX1,IGFBP2,INHBA,KCNJ11,KCNQ1,MAP1B,MDK,MYC,NEUROD1,NNMT,TNFRSF11B,OXCT1,PDE4B,PRNP,PTGS2,RORC,SCNN1B,SFRP2,SLC1A2,SST,SULT2A1,THBS1,TLR3,TYMS,UCHL1,UGT2B15,VEGFC,CXCR4,SLC28A2,AIM2,KCNE2,ABCC5,VAV3,SULT1B1,CYP2S1,GA…	84/-
5_Member	GO Biological Processes	GO:0009410	response to xenobiotic stimulus	-23.1796	-19.4331	9,13,100,210,218,495,768,999,1001,1063,1277,1536,1545,1558,1559,1562,1577,1645,1728,2203,2327,2329,2330,2626,2627,2876,2938,2939,2941,3033,3158,3162,3485,3624,3767,3784,4131,4192,4609,4760,4837,4982,5019,5142,5621,5743,6097,6338,6423,6506,6750,6822,7057,7098,7298,7345,7366,7424,7852,9153,9447,9992,10057,10451,27284,29785,51083,340485	NAT1,AADAC,ADA,ALAD,ALDH3A1,ATP4A,CA9,CDH1,CDH3,CENPF,COL1A1,CYBB,CYP1B1,CYP2C8,CYP2C9,CYP2C18,CYP3A5,AKR1C1,NQO1,FBP1,FMO2,FMO4,FMO5,GATA4,GATA6,GPX1,GSTA1,GSTA2,GSTA4,HADH,HMGCS2,HMOX1,IGFBP2,INHBA,KCNJ11,KCNQ1,MAP1B,MDK,MYC,NEUROD1,NNMT,TNFRSF11B,OXCT1,PDE4B,PRNP,PTGS2,RORC,SCNN1B,SFRP2,SLC1A2,SST,SULT2A1,THBS1,TLR3,TYMS,UCHL1,UGT2B15,VEGFC,CXCR4,SLC28A2,AIM2,KCNE2,ABCC5,VAV3,SULT1B1,CYP2S1,GA…	68/427
5_Member	GO Biological Processes	GO:0071466	cellular response to xenobiotic stimulus	-14.1748	-11.4794	9,13,100,218,1545,1558,1559,1562,1577,1645,1728,2203,2327,2329,2330,2938,2939,2941,3784,4609,5142,5621,6097,6822,7098,7345,7366,7852,9153,9447,9992,10057,27284,29785,340485	NAT1,AADAC,ADA,ALDH3A1,CYP1B1,CYP2C8,CYP2C9,CYP2C18,CYP3A5,AKR1C1,NQO1,FBP1,FMO2,FMO4,FMO5,GSTA1,GSTA2,GSTA4,KCNQ1,MYC,PDE4B,PRNP,RORC,SULT2A1,TLR3,UCHL1,UGT2B15,CXCR4,SLC28A2,AIM2,KCNE2,ABCC5,SULT1B1,CYP2S1,ACER2	35/190
5_Member	GO Biological Processes	GO:0006805	xenobiotic metabolic process	-10.3288	-8.08749	9,13,100,218,1545,1558,1559,1562,1577,1645,1728,2327,2329,2330,2938,2939,2941,6097,6822,7366,9153,10057,27284,29785	NAT1,AADAC,ADA,ALDH3A1,CYP1B1,CYP2C8,CYP2C9,CYP2C18,CYP3A5,AKR1C1,NQO1,FMO2,FMO4,FMO5,GSTA1,GSTA2,GSTA4,RORC,SULT2A1,UGT2B15,SLC28A2,ABCC5,SULT1B1,CYP2S1	24/125
5_Member	Reactome Gene Sets	R-HSA-211859	Biological oxidations	-7.58881	-5.59627	9,13,126,131,216,218,1545,1558,1559,1562,1577,2327,2938,2939,2941,4128,4837,5740,6819,6822,7366,22977,27284,29785,55902,91703,124975,246181	NAT1,AADAC,ADH1C,ADH7,ALDH1A1,ALDH3A1,CYP1B1,CYP2C8,CYP2C9,CYP2C18,CYP3A5,FMO2,GSTA1,GSTA2,GSTA4,MAOA,NNMT,PTGIS,SULT1C2,SULT2A1,UGT2B15,AKR7A3,SULT1B1,CYP2S1,ACSS2,ACY3,GGT6,AKR7L	28/222
5_Member	KEGG Pathway	hsa00980	Metabolism of xenobiotics by cytochrome P450	-7.53401	-5.55467	126,131,218,1545,1559,1577,1645,2938,2939,2941,3290,6822,7366,22977,29785,246181	ADH1C,ADH7,ALDH3A1,CYP1B1,CYP2C9,CYP3A5,AKR1C1,GSTA1,GSTA2,GSTA4,HSD11B1,SULT2A1,UGT2B15,AKR7A3,CYP2S1,AKR7L	16/78
5_Member	KEGG Pathway	hsa05204	Chemical carcinogenesis - DNA adducts	-6.60922	-4.75482	9,1545,1558,1559,1562,1577,1646,2938,2939,2941,3290,5743,6822,7366	NAT1,CYP1B1,CYP2C8,CYP2C9,CYP2C18,CYP3A5,AKR1C2,GSTA1,GSTA2,GSTA4,HSD11B1,PTGS2,SULT2A1,UGT2B15	14/69
5_Member	KEGG Pathway	hsa00982	Drug metabolism - cytochrome P450	-6.36881	-4.55555	126,131,218,1558,1559,1577,2327,2329,2330,2938,2939,2941,4128,7366	ADH1C,ADH7,ALDH3A1,CYP2C8,CYP2C9,CYP3A5,FMO2,FMO4,FMO5,GSTA1,GSTA2,GSTA4,MAOA,UGT2B15	14/72
5_Member	WikiPathways	WP702	Metapathway biotransformation Phase I and II	-6.24151	-4.44319	1545,1558,1559,1562,1577,1645,1646,2327,2329,2330,2938,2939,2941,4837,6819,6822,7366,8644,22977,27284,29785,57016,260293	CYP1B1,CYP2C8,CYP2C9,CYP2C18,CYP3A5,AKR1C1,AKR1C2,FMO2,FMO4,FMO5,GSTA1,GSTA2,GSTA4,NNMT,SULT1C2,SULT2A1,UGT2B15,AKR1C3,AKR7A3,SULT1B1,CYP2S1,AKR1B10,CYP4X1	23/185
5_Member	Reactome Gene Sets	R-HSA-211945	Phase I - Functionalization of compounds	-4.96908	-3.35212	13,126,131,216,218,1545,1558,1559,1562,1577,2327,4128,5740,29785,55902	AADAC,ADH1C,ADH7,ALDH1A1,ALDH3A1,CYP1B1,CYP2C8,CYP2C9,CYP2C18,CYP3A5,FMO2,MAOA,PTGIS,CYP2S1,ACSS2	15/106
6_Summary	GO Biological Processes	GO:0010817	regulation of hormone levels	-22.1349	-18.4853	126,131,216,301,358,1113,1131,1508,1513,1514,1522,1545,1558,1559,1562,1577,1601,1645,1646,2150,2243,2244,2266,2281,2697,2752,2852,3033,3169,3249,3569,3624,3767,3784,4760,5019,5125,5579,5799,6338,6528,6690,6696,6822,6865,7036,7366,8431,8644,22841,25874,25924,27284,29785,50506,51083,51092,51635,51738,53630,53905,54097,55512,56605,57016,57393,84976,90527,117247,131177,140606,145226,222546,405753,441…	ADH1C,ADH7,ALDH1A1,ANXA1,AQP1,CHGA,CHRM3,CTSB,CTSK,CTSL,CTSZ,CYP1B1,CYP2C8,CYP2C9,CYP2C18,CYP3A5,DAB2,AKR1C1,AKR1C2,F2RL1,FGA,FGB,FGG,FKBP1B,GJA1,GLUL,GPER1,HADH,FOXA1,HPN,IL6,INHBA,KCNJ11,KCNQ1,NEUROD1,OXCT1,PCSK5,PRKCB,PTPRN2,SCNN1B,SLC5A5,SPINK1,SPP1,SULT2A1,TACR2,TFR2,UGT2B15,NR0B2,AKR1C3,RAB11FIP2,MPC2,MYRIP,SULT1B1,CYP2S1,DUOX2,GAL,SIDT2,DHRS7,GHRL,BCO1,DUOX1,FAM3B,SMPD3,ERO1B,AKR1B10,CLTRN…	116/-
6_Member	GO Biological Processes	GO:0010817	regulation of hormone levels	-22.1349	-18.4853	126,131,216,301,358,1113,1131,1508,1513,1514,1522,1545,1558,1559,1562,1577,1601,1645,1646,2150,2243,2244,2266,2281,2697,2752,2852,3033,3169,3249,3569,3624,3767,3784,4760,5019,5125,5579,5799,6338,6528,6690,6696,6822,6865,7036,7366,8431,8644,22841,25874,25924,27284,29785,50506,51083,51092,51635,51738,53630,53905,54097,55512,56605,57016,57393,84976,90527,117247,131177,140606,145226,222546,405753,441…	ADH1C,ADH7,ALDH1A1,ANXA1,AQP1,CHGA,CHRM3,CTSB,CTSK,CTSL,CTSZ,CYP1B1,CYP2C8,CYP2C9,CYP2C18,CYP3A5,DAB2,AKR1C1,AKR1C2,F2RL1,FGA,FGB,FGG,FKBP1B,GJA1,GLUL,GPER1,HADH,FOXA1,HPN,IL6,INHBA,KCNJ11,KCNQ1,NEUROD1,OXCT1,PCSK5,PRKCB,PTPRN2,SCNN1B,SLC5A5,SPINK1,SPP1,SULT2A1,TACR2,TFR2,UGT2B15,NR0B2,AKR1C3,RAB11FIP2,MPC2,MYRIP,SULT1B1,CYP2S1,DUOX2,GAL,SIDT2,DHRS7,GHRL,BCO1,DUOX1,FAM3B,SMPD3,ERO1B,AKR1B10,CLTRN…	75/533
6_Member	GO Biological Processes	GO:1901615	organic hydroxy compound metabolic process	-14.9183	-12.1608	50,126,131,216,348,1508,1513,1545,1558,1559,1562,1577,1645,1646,1718,1728,1909,2638,2805,3067,3158,3418,3479,3638,3706,3930,3939,3953,4128,5205,6338,6528,6822,7108,8431,8644,9365,9464,10449,10998,22949,26002,27284,27329,50506,51635,51706,53630,53905,55902,57016,117247,130367,145226,165679,197257,222236,340485,441282	ACO2,ADH1C,ADH7,ALDH1A1,APOE,CTSB,CTSK,CYP1B1,CYP2C8,CYP2C9,CYP2C18,CYP3A5,AKR1C1,AKR1C2,DHCR24,NQO1,EDNRA,GC,GOT1,HDC,HMGCS2,IDH2,IGF1,INSIG1,ITPKA,LBR,LDHA,LEPR,MAOA,ATP8B1,SCNN1B,SLC5A5,SULT2A1,TM7SF2,NR0B2,AKR1C3,KL,HAND2,ACAA2,SLC27A5,PTGR1,MOXD1,SULT1B1,ANGPTL3,DUOX2,DHRS7,CYB5R1,BCO1,DUOX1,ACSS2,AKR1B10,SLC16A10,SGPP2,RDH12,SPTSSB,LDHD,NAPEPLD,ACER2,AKR1B15	59/476
6_Member	GO Biological Processes	GO:0042445	hormone metabolic process	-13.1431	-10.5428	126,131,216,1508,1513,1514,1522,1545,1558,1559,1562,1577,1645,1646,3169,5125,6338,6528,6696,6822,7366,8644,27284,29785,50506,51635,53630,53905,56605,57016,84976,117247,140606,145226,441282	ADH1C,ADH7,ALDH1A1,CTSB,CTSK,CTSL,CTSZ,CYP1B1,CYP2C8,CYP2C9,CYP2C18,CYP3A5,AKR1C1,AKR1C2,FOXA1,PCSK5,SCNN1B,SLC5A5,SPP1,SULT2A1,UGT2B15,AKR1C3,SULT1B1,CYP2S1,DUOX2,DHRS7,BCO1,DUOX1,ERO1B,AKR1B10,DISP1,SLC16A10,SELENOM,RDH12,AKR1B15	35/205
6_Member	GO Biological Processes	GO:0006066	alcohol metabolic process	-10.2626	-8.02464	50,126,131,216,348,1545,1558,1559,1562,1577,1645,1646,1718,2805,3158,3418,3479,3638,3706,3930,3953,6338,6822,7108,8431,8644,10449,26002,27284,27329,51635,53630,55902,57016,130367,145226,165679,222236,340485,441282	ACO2,ADH1C,ADH7,ALDH1A1,APOE,CYP1B1,CYP2C8,CYP2C9,CYP2C18,CYP3A5,AKR1C1,AKR1C2,DHCR24,GOT1,HMGCS2,IDH2,IGF1,INSIG1,ITPKA,LBR,LEPR,SCNN1B,SULT2A1,TM7SF2,NR0B2,AKR1C3,ACAA2,MOXD1,SULT1B1,ANGPTL3,DHRS7,BCO1,ACSS2,AKR1B10,SGPP2,RDH12,SPTSSB,NAPEPLD,ACER2,AKR1B15	40/324
6_Member	GO Biological Processes	GO:0034308	primary alcohol metabolic process	-10.2382	-8.00362	126,131,216,1545,1558,1562,1577,1645,1646,3479,6338,6822,8644,27284,51635,53630,55902,57016,145226,222236,441282	ADH1C,ADH7,ALDH1A1,CYP1B1,CYP2C8,CYP2C18,CYP3A5,AKR1C1,AKR1C2,IGF1,SCNN1B,SULT2A1,AKR1C3,SULT1B1,DHRS7,BCO1,ACSS2,AKR1B10,RDH12,NAPEPLD,AKR1B15	21/96
6_Member	GO Biological Processes	GO:0120254	olefinic compound metabolic process	-9.0075	-6.89699	126,131,216,1545,1558,1559,1562,1577,1645,1646,2876,2938,5740,5743,6338,8399,8644,29785,51635,53630,57016,60481,145226,441282	ADH1C,ADH7,ALDH1A1,CYP1B1,CYP2C8,CYP2C9,CYP2C18,CYP3A5,AKR1C1,AKR1C2,GPX1,GSTA1,PTGIS,PTGS2,SCNN1B,PLA2G10,AKR1C3,CYP2S1,DHRS7,BCO1,AKR1B10,ELOVL5,RDH12,AKR1B15	24/144
6_Member	GO Biological Processes	GO:0006721	terpenoid metabolic process	-8.39132	-6.32364	126,131,216,1545,1558,1559,1562,1577,1645,3158,5919,8644,29785,51635,53630,57016,145226,222236,441282	ADH1C,ADH7,ALDH1A1,CYP1B1,CYP2C8,CYP2C9,CYP2C18,CYP3A5,AKR1C1,HMGCS2,RARRES2,AKR1C3,CYP2S1,DHRS7,BCO1,AKR1B10,RDH12,NAPEPLD,AKR1B15	19/98
6_Member	GO Biological Processes	GO:0001523	retinoid metabolic process	-7.87123	-5.84489	126,131,216,1545,1558,1562,1577,1645,5919,8644,29785,51635,53630,57016,145226,222236,441282	ADH1C,ADH7,ALDH1A1,CYP1B1,CYP2C8,CYP2C18,CYP3A5,AKR1C1,RARRES2,AKR1C3,CYP2S1,DHRS7,BCO1,AKR1B10,RDH12,NAPEPLD,AKR1B15	17/84
6_Member	GO Biological Processes	GO:0016101	diterpenoid metabolic process	-7.63056	-5.63611	126,131,216,1545,1558,1562,1577,1645,5919,8644,29785,51635,53630,57016,145226,222236,441282	ADH1C,ADH7,ALDH1A1,CYP1B1,CYP2C8,CYP2C18,CYP3A5,AKR1C1,RARRES2,AKR1C3,CYP2S1,DHRS7,BCO1,AKR1B10,RDH12,NAPEPLD,AKR1B15	17/87
6_Member	GO Biological Processes	GO:0042572	retinol metabolic process	-7.32041	-5.3698	126,131,216,1545,1558,1562,1577,8644,51635,53630,57016,145226,441282	ADH1C,ADH7,ALDH1A1,CYP1B1,CYP2C8,CYP2C18,CYP3A5,AKR1C3,DHRS7,BCO1,AKR1B10,RDH12,AKR1B15	13/52
6_Member	GO Biological Processes	GO:0006720	isoprenoid metabolic process	-6.90708	-5.00723	126,131,216,1545,1558,1559,1562,1577,1645,3158,5919,8644,29785,51635,53630,57016,145226,222236,441282,729920	ADH1C,ADH7,ALDH1A1,CYP1B1,CYP2C8,CYP2C9,CYP2C18,CYP3A5,AKR1C1,HMGCS2,RARRES2,AKR1C3,CYP2S1,DHRS7,BCO1,AKR1B10,RDH12,NAPEPLD,AKR1B15,CRPPA	20/132
6_Member	KEGG Pathway	hsa00830	Retinol metabolism	-4.34518	-2.82722	126,131,216,1558,1559,1562,1577,7366,29785,53630,145226	ADH1C,ADH7,ALDH1A1,CYP2C8,CYP2C9,CYP2C18,CYP3A5,UGT2B15,CYP2S1,BCO1,RDH12	11/68
6_Member	GO Biological Processes	GO:0042573	retinoic acid metabolic process	-3.02864	-1.76858	126,131,1558,1562,1577,29785	ADH1C,ADH7,CYP2C8,CYP2C18,CYP3A5,CYP2S1	6/31
7_Summary	Canonical Pathways	M18	PID INTEGRIN1 PATHWAY	-22.0475	-18.4771	929,975,1277,1278,1280,1281,1282,1289,1290,1293,1301,2200,2243,2244,2266,2335,3371,3672,3679,4192,5328,6696,7045,7052,7057,7058,7412,80781,960,999,1284,1300,1307,1311,3383,3689,4060,256076,87,894,2012,2316,2318,3479,4638,5063,5579,7060,7424,8395,10398,10451,80310,7070,3055,55359,348,1536,1846,2252,2562,2591,3249,3315,4318,4609,4688,5125,5567,5774,5782,5803,6446,6456,6678,6776,8483,9365,23767,5484…	CD14,CD81,COL1A1,COL1A2,COL2A1,COL3A1,COL4A1,COL5A1,COL5A2,COL6A3,COL11A1,FBN1,FGA,FGB,FGG,FN1,TNC,ITGA1,ITGA7,MDK,PLAU,SPP1,TGFBI,TGM2,THBS1,THBS2,VCAM1,COL18A1,CD44,CDH1,COL4A2,COL10A1,COL16A1,COMP,ICAM1,ITGB2,LUM,COL6A5,ACTN1,CCND2,EMP1,FLNA,FLNC,IGF1,MYLK,PAK3,PRKCB,THBS4,VEGFC,PIP5K1B,MYL9,VAV3,PDGFD,THY1,HCK,STYK1,APOE,CYBB,DUSP4,FGF7,GABRB3,GALNT3,HPN,HSPB1,MMP9,MYC,NCF2,PCSK5,PRKACB,PTPN3…	99/-
7_Member	Canonical Pathways	M18	PID INTEGRIN1 PATHWAY	-22.0475	-18.4771	929,975,1277,1278,1280,1281,1282,1289,1290,1293,1301,2200,2243,2244,2266,2335,3371,3672,3679,4192,5328,6696,7045,7052,7057,7058,7412,80781	CD14,CD81,COL1A1,COL1A2,COL2A1,COL3A1,COL4A1,COL5A1,COL5A2,COL6A3,COL11A1,FBN1,FGA,FGB,FGG,FN1,TNC,ITGA1,ITGA7,MDK,PLAU,SPP1,TGFBI,TGM2,THBS1,THBS2,VCAM1,COL18A1	28/66
7_Member	Reactome Gene Sets	R-HSA-216083	Integrin cell surface interactions	-20.7934	-17.3991	960,999,1277,1278,1280,1281,1282,1284,1289,1290,1293,1300,1307,1311,2200,2243,2244,2266,2335,3371,3383,3672,3679,3689,4060,6696,7057,7412,80781,256076	CD44,CDH1,COL1A1,COL1A2,COL2A1,COL3A1,COL4A1,COL4A2,COL5A1,COL5A2,COL6A3,COL10A1,COL16A1,COMP,FBN1,FGA,FGB,FGG,FN1,TNC,ICAM1,ITGA1,ITGA7,ITGB2,LUM,SPP1,THBS1,VCAM1,COL18A1,COL6A5	30/85
7_Member	KEGG Pathway	hsa04510	Focal adhesion	-9.74979	-7.56558	87,894,1277,1278,1280,1282,1284,1293,1311,2012,2316,2318,2335,3371,3479,3672,3679,4638,5063,5579,6696,7057,7058,7060,7424,8395,10398,10451,80310,256076	ACTN1,CCND2,COL1A1,COL1A2,COL2A1,COL4A1,COL4A2,COL6A3,COMP,EMP1,FLNA,FLNC,FN1,TNC,IGF1,ITGA1,ITGA7,MYLK,PAK3,PRKCB,SPP1,THBS1,THBS2,THBS4,VEGFC,PIP5K1B,MYL9,VAV3,PDGFD,COL6A5	30/203
7_Member	Canonical Pathways	M53	PID INTEGRIN3 PATHWAY	-9.50644	-7.33972	1277,1278,1282,2200,2243,2244,2266,2335,3371,5328,6696,7045,7057,7070	COL1A1,COL1A2,COL4A1,FBN1,FGA,FGB,FGG,FN1,TNC,PLAU,SPP1,TGFBI,THBS1,THY1	14/43
7_Member	WikiPathways	WP306	Focal adhesion	-9.35362	-7.21725	87,894,1277,1278,1280,1282,1284,1290,1311,2316,2318,2335,3055,3371,3479,3672,3679,4638,5063,5579,6696,7057,7058,7060,7424,10398,10451,55359,80310	ACTN1,CCND2,COL1A1,COL1A2,COL2A1,COL4A1,COL4A2,COL5A2,COMP,FLNA,FLNC,FN1,HCK,TNC,IGF1,ITGA1,ITGA7,MYLK,PAK3,PRKCB,SPP1,THBS1,THBS2,THBS4,VEGFC,MYL9,VAV3,STYK1,PDGFD	29/198
7_Member	Reactome Gene Sets	R-HSA-9006934	Signaling by Receptor Tyrosine Kinases	-8.18017	-6.12828	348,1277,1278,1280,1281,1282,1284,1289,1290,1293,1301,1536,1846,2252,2335,2562,2591,3249,3315,3479,4192,4318,4609,4688,5063,5125,5567,5579,5774,5782,5803,6446,6456,6678,6696,6776,7057,7058,7060,7424,8483,9365,10451,23767,54845,80004,80310,145957,256076	APOE,COL1A1,COL1A2,COL2A1,COL3A1,COL4A1,COL4A2,COL5A1,COL5A2,COL6A3,COL11A1,CYBB,DUSP4,FGF7,FN1,GABRB3,GALNT3,HPN,HSPB1,IGF1,MDK,MMP9,MYC,NCF2,PAK3,PCSK5,PRKACB,PRKCB,PTPN3,PTPN12,PTPRZ1,SGK1,SH3GL2,SPARC,SPP1,STAT5A,THBS1,THBS2,THBS4,VEGFC,CILP,KL,VAV3,FLRT3,ESRP1,ESRP2,PDGFD,NRG4,COL6A5	49/524
7_Member	KEGG Pathway	hsa04512	ECM-receptor interaction	-7.55276	-5.56782	960,1277,1278,1280,1282,1284,1293,1311,2335,3371,3672,3679,6696,7057,7058,7060,256076	CD44,COL1A1,COL1A2,COL2A1,COL4A1,COL4A2,COL6A3,COMP,FN1,TNC,ITGA1,ITGA7,SPP1,THBS1,THBS2,THBS4,COL6A5	17/88
7_Member	WikiPathways	WP4172	PI3K-Akt signaling pathway	-5.21792	-3.56397	894,898,1277,1278,1280,1282,1284,1293,1311,2252,2335,3371,3479,3569,3672,3679,4609,5523,5525,5618,6446,6696,7057,7058,7060,7424,10110,59345,80310,118788,256076	CCND2,CCNE1,COL1A1,COL1A2,COL2A1,COL4A1,COL4A2,COL6A3,COMP,FGF7,FN1,TNC,IGF1,IL6,ITGA1,ITGA7,MYC,PPP2R3A,PPP2R5A,PRLR,SGK1,SPP1,THBS1,THBS2,THBS4,VEGFC,SGK2,GNB4,PDGFD,PIK3AP1,COL6A5	31/339
7_Member	WikiPathways	WP3932	Focal adhesion: PI3K-Akt-mTOR-signaling pathway	-4.88597	-3.28327	1277,1278,1280,1281,1282,1284,1289,1290,1301,1311,2252,2335,3169,3371,3479,3679,3689,5523,5525,5618,6696,7057,7058,7060,7424,23216,59345,80310	COL1A1,COL1A2,COL2A1,COL3A1,COL4A1,COL4A2,COL5A1,COL5A2,COL11A1,COMP,FGF7,FN1,FOXA1,TNC,IGF1,ITGA7,ITGB2,PPP2R3A,PPP2R5A,PRLR,SPP1,THBS1,THBS2,THBS4,VEGFC,TBC1D1,GNB4,PDGFD	28/302
7_Member	KEGG Pathway	hsa04151	PI3K-Akt signaling pathway	-4.84277	-3.24684	894,898,1277,1278,1280,1282,1284,1293,1311,2252,2335,3371,3479,3569,3672,3679,4609,5523,5525,5618,6446,6696,7057,7058,7060,7424,10110,59345,80310,118788,256076	CCND2,CCNE1,COL1A1,COL1A2,COL2A1,COL4A1,COL4A2,COL6A3,COMP,FGF7,FN1,TNC,IGF1,IL6,ITGA1,ITGA7,MYC,PPP2R3A,PPP2R5A,PRLR,SGK1,SPP1,THBS1,THBS2,THBS4,VEGFC,SGK2,GNB4,PDGFD,PIK3AP1,COL6A5	31/354
7_Member	KEGG Pathway	hsa05165	Human papillomavirus infection	-4.17231	-2.69004	355,890,894,898,1277,1278,1280,1282,1284,1293,1311,2335,2535,3371,3672,3679,5523,5525,5567,5743,6696,7057,7058,7060,7098,8638,9636,256076	FAS,CCNA2,CCND2,CCNE1,COL1A1,COL1A2,COL2A1,COL4A1,COL4A2,COL6A3,COMP,FN1,FZD2,TNC,ITGA1,ITGA7,PPP2R3A,PPP2R5A,PRKACB,PTGS2,SPP1,THBS1,THBS2,THBS4,TLR3,OASL,ISG15,COL6A5	28/331
8_Summary	GO Biological Processes	GO:0009725	response to hormone	-21.7677	-18.2642	210,283,301,358,361,594,760,890,990,1152,1277,1281,1364,1508,1513,1514,1536,1545,1601,1645,1646,1718,1728,1909,2104,2200,2203,2244,2627,2650,2805,2852,2875,2876,3033,3158,3162,3249,3304,3485,3490,3569,3624,3638,3784,3953,4131,4192,4199,4246,4982,5019,5068,5176,5319,5618,5743,5919,5967,6337,6338,6340,6424,6446,6528,6586,6690,6696,6750,6751,6776,7031,7057,7076,7077,7298,8644,9076,9353,9365,10095,11…	ALAD,ANG,ANXA1,AQP1,AQP4,BCKDHB,CA2,CCNA2,CDC6,CKB,COL1A1,COL3A1,CLDN4,CTSB,CTSK,CTSL,CYBB,CYP1B1,DAB2,AKR1C1,AKR1C2,DHCR24,NQO1,EDNRA,ESRRG,FBN1,FBP1,FGB,GATA6,GCNT1,GOT1,GPER1,GPT,GPX1,HADH,HMGCS2,HMOX1,HPN,HSPA1B,IGFBP2,IGFBP7,IL6,INHBA,INSIG1,KCNQ1,LEPR,MAP1B,MDK,ME1,SCGB2A1,TNFRSF11B,OXCT1,REG3A,SERPINF1,PLA2G1B,PRLR,PTGS2,RARRES2,REG1A,SCNN1A,SCNN1B,SCNN1G,SFRP4,SGK1,SLC5A5,SLIT3,SPINK1,SPP…	132/-
8_Member	GO Biological Processes	GO:0009725	response to hormone	-21.7677	-18.2642	210,283,301,358,361,594,760,890,990,1152,1277,1281,1364,1508,1513,1514,1536,1545,1601,1645,1646,1718,1728,1909,2104,2200,2203,2244,2627,2650,2805,2852,2875,2876,3033,3158,3162,3249,3304,3485,3490,3569,3624,3638,3784,3953,4131,4192,4199,4246,4982,5019,5068,5176,5319,5618,5743,5919,5967,6337,6338,6340,6424,6446,6528,6586,6690,6696,6750,6751,6776,7031,7057,7076,7077,7298,8644,9076,9353,9365,10095,11…	ALAD,ANG,ANXA1,AQP1,AQP4,BCKDHB,CA2,CCNA2,CDC6,CKB,COL1A1,COL3A1,CLDN4,CTSB,CTSK,CTSL,CYBB,CYP1B1,DAB2,AKR1C1,AKR1C2,DHCR24,NQO1,EDNRA,ESRRG,FBN1,FBP1,FGB,GATA6,GCNT1,GOT1,GPER1,GPT,GPX1,HADH,HMGCS2,HMOX1,HPN,HSPA1B,IGFBP2,IGFBP7,IL6,INHBA,INSIG1,KCNQ1,LEPR,MAP1B,MDK,ME1,SCGB2A1,TNFRSF11B,OXCT1,REG3A,SERPINF1,PLA2G1B,PRLR,PTGS2,RARRES2,REG1A,SCNN1A,SCNN1B,SCNN1G,SFRP4,SGK1,SLC5A5,SLIT3,SPINK1,SPP…	93/788
8_Member	GO Biological Processes	GO:1901699	cellular response to nitrogen compound	-12.8831	-10.3127	154,333,358,760,890,990,999,1131,1277,1278,1281,1282,1290,1307,1536,1545,1811,1816,1909,2200,2203,2316,2348,2562,2697,2771,2805,2852,2875,2983,3158,3383,3434,3479,3624,3638,3784,4131,5142,5179,5319,5579,5621,5743,5919,6337,6338,6340,6506,6528,6690,6776,6935,7052,7098,7412,7852,9349,9353,11031,28999,54209,55512,58528,80310,120892	ADRB2,APLP1,AQP1,CA2,CCNA2,CDC6,CDH1,CHRM3,COL1A1,COL1A2,COL3A1,COL4A1,COL5A2,COL16A1,CYBB,CYP1B1,SLC26A3,DRD5,EDNRA,FBN1,FBP1,FLNA,FOLR1,GABRB3,GJA1,GNAI2,GOT1,GPER1,GPT,GUCY1B1,HMGCS2,ICAM1,IFIT1,IGF1,INHBA,INSIG1,KCNQ1,MAP1B,PDE4B,PENK,PLA2G1B,PRKCB,PRNP,PTGS2,RARRES2,SCNN1A,SCNN1B,SCNN1G,SLC1A2,SLC5A5,SPINK1,STAT5A,ZEB1,TGM2,TLR3,VCAM1,CXCR4,RPL23,SLIT2,RAB31,KLF15,TREM2,SMPD3,RRAGD,PDGFD,LRR…	66/635
8_Member	GO Biological Processes	GO:0071417	cellular response to organonitrogen compound	-12.6496	-10.1205	154,333,358,760,890,990,999,1131,1277,1278,1281,1282,1290,1307,1536,1545,1811,1816,1909,2200,2203,2316,2348,2562,2697,2771,2805,2852,2875,3158,3383,3479,3624,3638,3784,4131,5142,5179,5319,5579,5621,5743,5919,6337,6338,6340,6506,6528,6690,6776,6935,7052,7412,7852,9349,9353,11031,28999,54209,55512,58528,80310,120892	ADRB2,APLP1,AQP1,CA2,CCNA2,CDC6,CDH1,CHRM3,COL1A1,COL1A2,COL3A1,COL4A1,COL5A2,COL16A1,CYBB,CYP1B1,SLC26A3,DRD5,EDNRA,FBN1,FBP1,FLNA,FOLR1,GABRB3,GJA1,GNAI2,GOT1,GPER1,GPT,HMGCS2,ICAM1,IGF1,INHBA,INSIG1,KCNQ1,MAP1B,PDE4B,PENK,PLA2G1B,PRKCB,PRNP,PTGS2,RARRES2,SCNN1A,SCNN1B,SCNN1G,SLC1A2,SLC5A5,SPINK1,STAT5A,ZEB1,TGM2,VCAM1,CXCR4,RPL23,SLIT2,RAB31,KLF15,TREM2,SMPD3,RRAGD,PDGFD,LRRK2	63/596
8_Member	GO Biological Processes	GO:1901652	response to peptide	-11.6804	-9.26638	154,301,760,890,990,1277,1281,1513,1536,1545,1909,2200,2203,2650,2697,2805,2852,2875,3033,3158,3383,3479,3624,3638,3784,4131,4318,4321,5068,5176,5319,5621,5743,5919,5967,6337,6338,6340,6690,6776,7031,7076,7128,7412,9349,9365,11031,22861,28999,51083,54209,55512	ADRB2,ANXA1,CA2,CCNA2,CDC6,COL1A1,COL3A1,CTSK,CYBB,CYP1B1,EDNRA,FBN1,FBP1,GCNT1,GJA1,GOT1,GPER1,GPT,HADH,HMGCS2,ICAM1,IGF1,INHBA,INSIG1,KCNQ1,MAP1B,MMP9,MMP12,REG3A,SERPINF1,PLA2G1B,PRNP,PTGS2,RARRES2,REG1A,SCNN1A,SCNN1B,SCNN1G,SPINK1,STAT5A,TFF1,TIMP1,TNFAIP3,VCAM1,RPL23,KL,RAB31,NLRP1,KLF15,GAL,TREM2,SMPD3	52/459
8_Member	GO Biological Processes	GO:0032870	cellular response to hormone stimulus	-10.1253	-7.9038	301,358,760,890,990,1152,1508,1514,1545,1645,1646,1909,2104,2200,2203,2244,2627,2805,2852,2875,3158,3304,3485,3490,3624,3638,3953,4131,4246,5176,5319,5618,5919,6337,6338,6340,6446,6528,6586,6690,6750,6751,6776,8644,9353,11031,11057,51738,56937,84830,85315,114907	ANXA1,AQP1,CA2,CCNA2,CDC6,CKB,CTSB,CTSL,CYP1B1,AKR1C1,AKR1C2,EDNRA,ESRRG,FBN1,FBP1,FGB,GATA6,GOT1,GPER1,GPT,HMGCS2,HSPA1B,IGFBP2,IGFBP7,INHBA,INSIG1,LEPR,MAP1B,SCGB2A1,SERPINF1,PLA2G1B,PRLR,RARRES2,SCNN1A,SCNN1B,SCNN1G,SGK1,SLC5A5,SLIT3,SPINK1,SST,SSTR1,STAT5A,AKR1C3,SLIT2,RAB31,ABHD2,GHRL,PMEPA1,ADTRP,PAQR8,FBXO32	52/505
8_Member	GO Biological Processes	GO:0043434	response to peptide hormone	-7.48211	-5.51376	301,760,890,990,1277,1281,1513,1536,1545,1909,2200,2203,2650,2805,2852,2875,3033,3158,3624,3638,3784,4131,5068,5319,5743,5919,5967,6337,6338,6340,6690,6776,7031,7076,9365,11031,28999,51083	ANXA1,CA2,CCNA2,CDC6,COL1A1,COL3A1,CTSK,CYBB,CYP1B1,EDNRA,FBN1,FBP1,GCNT1,GOT1,GPER1,GPT,HADH,HMGCS2,INHBA,INSIG1,KCNQ1,MAP1B,REG3A,PLA2G1B,PTGS2,RARRES2,REG1A,SCNN1A,SCNN1B,SCNN1G,SPINK1,STAT5A,TFF1,TIMP1,KL,RAB31,KLF15,GAL	38/372
8_Member	GO Biological Processes	GO:1901653	cellular response to peptide	-6.41416	-4.59065	154,760,890,990,1545,1909,2200,2203,2697,2805,2852,2875,3158,3383,3479,3624,3638,4131,5319,5621,5919,6337,6338,6340,6690,6776,7412,9349,11031,28999,54209,55512	ADRB2,CA2,CCNA2,CDC6,CYP1B1,EDNRA,FBN1,FBP1,GJA1,GOT1,GPER1,GPT,HMGCS2,ICAM1,IGF1,INHBA,INSIG1,MAP1B,PLA2G1B,PRNP,RARRES2,SCNN1A,SCNN1B,SCNN1G,SPINK1,STAT5A,VCAM1,RPL23,RAB31,KLF15,TREM2,SMPD3	32/313
8_Member	GO Biological Processes	GO:0071375	cellular response to peptide hormone stimulus	-3.7491	-2.33454	760,890,990,1545,1909,2200,2203,2805,2852,2875,3158,3624,3638,4131,5319,5919,6337,6338,6340,6690,6776,11031	CA2,CCNA2,CDC6,CYP1B1,EDNRA,FBN1,FBP1,GOT1,GPER1,GPT,HMGCS2,INHBA,INSIG1,MAP1B,PLA2G1B,RARRES2,SCNN1A,SCNN1B,SCNN1G,SPINK1,STAT5A,RAB31	22/246
9_Summary	GO Biological Processes	GO:0009611	response to wounding	-21.0715	-17.626	309,358,710,928,953,960,1001,1277,1281,1289,1311,1649,1809,1816,1909,2150,2243,2244,2252,2266,2316,2335,2348,2626,2876,3162,3315,3371,3479,3569,3776,4131,4192,4321,5051,5055,5270,5328,5341,5359,5873,6279,6288,6506,7070,7076,7098,7305,8527,9076,10398,10451,11057,22875,23767,26509,50808,51090,54209,54566,54959,55959,60681,64714,83478,83481,92421,100,187,348,361,1131,2191,2771,5054,5567,5618,6337,63…	ANXA6,AQP1,SERPING1,CD9,ENTPD1,CD44,CDH3,COL1A1,COL3A1,COL5A1,COMP,DDIT3,DPYSL3,DRD5,EDNRA,F2RL1,FGA,FGB,FGF7,FGG,FLNA,FN1,FOLR1,GATA4,GPX1,HMOX1,HSPB1,TNC,IGF1,IL6,KCNK2,MAP1B,MDK,MMP12,PAFAH2,SERPINB2,SERPINE2,PLAU,PLEK,PLSCR1,RAB27A,S100A8,SAA1,SLC1A2,THY1,TIMP1,TLR3,TYROBP,DGKD,CLDN1,MYL9,VAV3,ABHD2,ENPP4,FLRT3,MYOF,AK3,PLLP,TREM2,EPB41L4B,ODAM,SULF2,FKBP10,PDIA2,ARHGAP24,EPPK1,CHMP4C,ADA,APL…	92/-
9_Member	GO Biological Processes	GO:0009611	response to wounding	-21.0715	-17.626	309,358,710,928,953,960,1001,1277,1281,1289,1311,1649,1809,1816,1909,2150,2243,2244,2252,2266,2316,2335,2348,2626,2876,3162,3315,3371,3479,3569,3776,4131,4192,4321,5051,5055,5270,5328,5341,5359,5873,6279,6288,6506,7070,7076,7098,7305,8527,9076,10398,10451,11057,22875,23767,26509,50808,51090,54209,54566,54959,55959,60681,64714,83478,83481,92421	ANXA6,AQP1,SERPING1,CD9,ENTPD1,CD44,CDH3,COL1A1,COL3A1,COL5A1,COMP,DDIT3,DPYSL3,DRD5,EDNRA,F2RL1,FGA,FGB,FGF7,FGG,FLNA,FN1,FOLR1,GATA4,GPX1,HMOX1,HSPB1,TNC,IGF1,IL6,KCNK2,MAP1B,MDK,MMP12,PAFAH2,SERPINB2,SERPINE2,PLAU,PLEK,PLSCR1,RAB27A,S100A8,SAA1,SLC1A2,THY1,TIMP1,TLR3,TYROBP,DGKD,CLDN1,MYL9,VAV3,ABHD2,ENPP4,FLRT3,MYOF,AK3,PLLP,TREM2,EPB41L4B,ODAM,SULF2,FKBP10,PDIA2,ARHGAP24,EPPK1,CHMP4C	67/452
9_Member	GO Biological Processes	GO:0042060	wound healing	-15.3725	-12.5011	309,358,710,928,953,960,1001,1277,1281,1289,1311,1816,2150,2243,2244,2266,2316,2335,2626,2876,3162,3315,3479,3569,4321,5051,5055,5270,5328,5341,5359,5873,6279,6288,7076,8527,9076,10398,10451,22875,26509,50808,54566,54959,60681,64714,83478,83481,92421	ANXA6,AQP1,SERPING1,CD9,ENTPD1,CD44,CDH3,COL1A1,COL3A1,COL5A1,COMP,DRD5,F2RL1,FGA,FGB,FGG,FLNA,FN1,GATA4,GPX1,HMOX1,HSPB1,IGF1,IL6,MMP12,PAFAH2,SERPINB2,SERPINE2,PLAU,PLEK,PLSCR1,RAB27A,S100A8,SAA1,TIMP1,DGKD,CLDN1,MYL9,VAV3,ENPP4,MYOF,AK3,EPB41L4B,ODAM,FKBP10,PDIA2,ARHGAP24,EPPK1,CHMP4C	49/334
9_Member	GO Biological Processes	GO:0050878	regulation of body fluid levels	-13.9661	-11.3077	100,187,348,358,361,710,928,953,1131,1281,1311,2150,2191,2243,2244,2266,2316,2771,3315,3569,5051,5054,5055,5270,5328,5341,5359,5567,5618,5873,6288,6337,6338,6340,6690,6776,7057,7103,8527,10398,10451,10551,11117,22875,50808,64714,84034,84830	ADA,APLNR,APOE,AQP1,AQP4,SERPING1,CD9,ENTPD1,CHRM3,COL3A1,COMP,F2RL1,FAP,FGA,FGB,FGG,FLNA,GNAI2,HSPB1,IL6,PAFAH2,SERPINE1,SERPINB2,SERPINE2,PLAU,PLEK,PLSCR1,PRKACB,PRLR,RAB27A,SAA1,SCNN1A,SCNN1B,SCNN1G,SPINK1,STAT5A,THBS1,TSPAN8,DGKD,MYL9,VAV3,AGR2,EMILIN1,ENPP4,AK3,PDIA2,EMILIN2,ADTRP	48/349
9_Member	GO Biological Processes	GO:0007596	blood coagulation	-7.98478	-5.94797	710,928,953,1281,1311,2150,2243,2244,2266,2316,3315,3569,5051,5270,5328,5341,5359,5873,6288,8527,10398,10451,22875,50808,64714	SERPING1,CD9,ENTPD1,COL3A1,COMP,F2RL1,FGA,FGB,FGG,FLNA,HSPB1,IL6,PAFAH2,SERPINE2,PLAU,PLEK,PLSCR1,RAB27A,SAA1,DGKD,MYL9,VAV3,ENPP4,AK3,PDIA2	25/174
9_Member	GO Biological Processes	GO:0050817	coagulation	-7.88256	-5.85206	710,928,953,1281,1311,2150,2243,2244,2266,2316,3315,3569,5051,5270,5328,5341,5359,5873,6288,8527,10398,10451,22875,50808,64714	SERPING1,CD9,ENTPD1,COL3A1,COMP,F2RL1,FGA,FGB,FGG,FLNA,HSPB1,IL6,PAFAH2,SERPINE2,PLAU,PLEK,PLSCR1,RAB27A,SAA1,DGKD,MYL9,VAV3,ENPP4,AK3,PDIA2	25/176
9_Member	GO Biological Processes	GO:0007599	hemostasis	-7.68294	-5.67874	710,928,953,1281,1311,2150,2243,2244,2266,2316,3315,3569,5051,5270,5328,5341,5359,5873,6288,8527,10398,10451,22875,50808,64714	SERPING1,CD9,ENTPD1,COL3A1,COMP,F2RL1,FGA,FGB,FGG,FLNA,HSPB1,IL6,PAFAH2,SERPINE2,PLAU,PLEK,PLSCR1,RAB27A,SAA1,DGKD,MYL9,VAV3,ENPP4,AK3,PDIA2	25/180
9_Member	GO Biological Processes	GO:0030168	platelet activation	-6.76807	-4.88638	928,1281,1311,2243,2244,2266,2316,3315,3569,5270,5341,5359,6288,8527,10398,10451,64714	CD9,COL3A1,COMP,FGA,FGB,FGG,FLNA,HSPB1,IL6,SERPINE2,PLEK,PLSCR1,SAA1,DGKD,MYL9,VAV3,PDIA2	17/99
9_Member	GO Biological Processes	GO:0034109	homotypic cell-cell adhesion	-6.18721	-4.39736	1311,1525,1824,1829,2243,2244,2266,2316,3315,5341,10398,54825,64714	COMP,CXADR,DSC2,DSG2,FGA,FGB,FGG,FLNA,HSPB1,PLEK,MYL9,CDHR2,PDIA2	13/64
9_Member	GO Biological Processes	GO:0070527	platelet aggregation	-4.24808	-2.74771	1311,2243,2244,2266,2316,3315,5341,10398,64714	COMP,FGA,FGB,FGG,FLNA,HSPB1,PLEK,MYL9,PDIA2	9/47
10_Summary	GO Biological Processes	GO:0006954	inflammatory response	-20.2082	-16.901	12,241,301,604,718,719,727,929,960,1116,1536,2150,2214,2335,2359,2852,2919,2920,3055,3162,3373,3428,3487,3569,3576,3620,3627,3689,4192,4283,4501,5004,5005,5068,5320,5359,5733,5743,5919,6279,6280,6288,6338,6347,6355,6362,6401,6696,7036,7057,7076,7098,7128,7130,7305,7412,7852,8399,9332,9365,9447,9450,10551,10563,22861,23643,27159,27293,51083,54209,54959,90355,115362,388125,136,975,1012,2281,2316,26…	SERPINA3,ALOX5AP,ANXA1,BCL6,C3,C3AR1,C5,CD14,CD44,CHI3L1,CYBB,F2RL1,FCGR3A,FN1,FPR3,GPER1,CXCL1,CXCL2,HCK,HMOX1,HYAL1,IFI16,IGFBP4,IL6,CXCL8,IDO1,CXCL10,ITGB2,MDK,CXCL9,MT1X,ORM1,ORM2,REG3A,PLA2G2A,PLSCR1,PTGER3,PTGS2,RARRES2,S100A8,S100A9,SAA1,SCNN1B,CCL2,CCL8,CCL18,SELE,SPP1,TFR2,THBS1,TIMP1,TLR3,TNFAIP3,TNFAIP6,TYROBP,VCAM1,CXCR4,PLA2G10,CD163,KL,AIM2,LY86,AGR2,CXCL13,NLRP1,LY96,CHIA,SMPDL3B,G…	132/-
10_Member	GO Biological Processes	GO:0006954	inflammatory response	-20.2082	-16.901	12,241,301,604,718,719,727,929,960,1116,1536,2150,2214,2335,2359,2852,2919,2920,3055,3162,3373,3428,3487,3569,3576,3620,3627,3689,4192,4283,4501,5004,5005,5068,5320,5359,5733,5743,5919,6279,6280,6288,6338,6347,6355,6362,6401,6696,7036,7057,7076,7098,7128,7130,7305,7412,7852,8399,9332,9365,9447,9450,10551,10563,22861,23643,27159,27293,51083,54209,54959,90355,115362,388125	SERPINA3,ALOX5AP,ANXA1,BCL6,C3,C3AR1,C5,CD14,CD44,CHI3L1,CYBB,F2RL1,FCGR3A,FN1,FPR3,GPER1,CXCL1,CXCL2,HCK,HMOX1,HYAL1,IFI16,IGFBP4,IL6,CXCL8,IDO1,CXCL10,ITGB2,MDK,CXCL9,MT1X,ORM1,ORM2,REG3A,PLA2G2A,PLSCR1,PTGER3,PTGS2,RARRES2,S100A8,S100A9,SAA1,SCNN1B,CCL2,CCL8,CCL18,SELE,SPP1,TFR2,THBS1,TIMP1,TLR3,TNFAIP3,TNFAIP6,TYROBP,VCAM1,CXCR4,PLA2G10,CD163,KL,AIM2,LY86,AGR2,CXCL13,NLRP1,LY96,CHIA,SMPDL3B,G…	74/560
10_Member	GO Biological Processes	GO:0032103	positive regulation of response to external stimulus	-16.9772	-13.8839	136,241,718,719,929,975,1012,2150,2281,2316,2634,3055,3304,3315,3428,3569,3576,3620,3627,3956,4057,4192,4321,4332,5054,5063,5225,5320,5328,5359,5733,5743,5919,6279,6280,7057,7060,7098,7128,7305,7424,7852,8638,9353,9447,9450,10563,11117,22841,22861,23180,23643,27250,51738,54209,54502,55450,55601,64094,80310,84034,115362,118788,120892,222236,284340,388125	ADORA2B,ALOX5AP,C3,C3AR1,CD14,CD81,CDH13,F2RL1,FKBP1B,FLNA,GBP2,HCK,HSPA1B,HSPB1,IFI16,IL6,CXCL8,IDO1,CXCL10,LGALS1,LTF,MDK,MMP12,MNDA,SERPINE1,PAK3,PGC,PLA2G2A,PLAU,PLSCR1,PTGER3,PTGS2,RARRES2,S100A8,S100A9,THBS1,THBS4,TLR3,TNFAIP3,TYROBP,VEGFC,CXCR4,OASL,SLIT2,AIM2,LY86,CXCL13,EMILIN1,RAB11FIP2,NLRP1,RFTN1,LY96,PDCD4,GHRL,TREM2,RBM47,CAMK2N1,DDX60,SMOC2,PDGFD,EMILIN2,GBP5,PIK3AP1,LRRK2,NAPEPLD,…	67/538
10_Member	GO Biological Processes	GO:0031347	regulation of defense response	-15.7986	-12.8814	100,136,241,301,348,604,683,710,718,929,975,2150,2627,2634,2852,2876,3055,3304,3371,3428,3479,3569,3620,3956,4057,4192,4318,4321,4332,4345,5054,5063,5068,5176,5179,5225,5320,5359,5654,5733,5740,5743,6279,6280,6288,6401,7098,7128,7130,7305,8399,8638,9021,9314,9447,9636,10875,11117,11221,22841,22861,23180,23643,27250,27293,51738,54209,54502,55061,55450,55601,55646,84034,90355,90527,115362,118788,12…	ADA,ADORA2B,ALOX5AP,ANXA1,APOE,BCL6,BST1,SERPING1,C3,CD14,CD81,F2RL1,GATA6,GBP2,GPER1,GPX1,HCK,HSPA1B,TNC,IFI16,IGF1,IL6,IDO1,LGALS1,LTF,MDK,MMP9,MMP12,MNDA,CD200,SERPINE1,PAK3,REG3A,SERPINF1,PENK,PGC,PLA2G2A,PLSCR1,HTRA1,PTGER3,PTGIS,PTGS2,S100A8,S100A9,SAA1,SELE,TLR3,TNFAIP3,TNFAIP6,TYROBP,PLA2G10,OASL,SOCS3,KLF4,AIM2,ISG15,FGL2,EMILIN1,DUSP10,RAB11FIP2,NLRP1,RFTN1,LY96,PDCD4,SMPDL3B,GHRL,TREM2…	82/792
10_Member	GO Biological Processes	GO:0050727	regulation of inflammatory response	-13.4017	-10.7855	100,136,241,301,348,604,683,718,975,2852,2876,3055,3371,3479,3569,3620,3956,4192,4318,4345,5054,5068,5176,5320,5733,5740,5743,6279,6280,6288,6401,7098,7128,7130,8399,9021,9314,9447,11221,22861,27250,27293,51738,54209,55450,90355,90527,118788,120892,222236,284340,388125,405753	ADA,ADORA2B,ALOX5AP,ANXA1,APOE,BCL6,BST1,C3,CD81,GPER1,GPX1,HCK,TNC,IGF1,IL6,IDO1,LGALS1,MDK,MMP9,CD200,SERPINE1,REG3A,SERPINF1,PLA2G2A,PTGER3,PTGIS,PTGS2,S100A8,S100A9,SAA1,SELE,TLR3,TNFAIP3,TNFAIP6,PLA2G10,SOCS3,KLF4,AIM2,DUSP10,NLRP1,PDCD4,SMPDL3B,GHRL,TREM2,CAMK2N1,MACIR,DUOXA1,PIK3AP1,LRRK2,NAPEPLD,CXCL17,C2CD4B,DUOXA2	53/429
10_Member	GO Biological Processes	GO:0031349	positive regulation of defense response	-11.8503	-9.4156	136,241,718,929,975,2150,2634,3055,3304,3428,3569,3620,3956,4057,4192,4321,4332,5054,5063,5179,5225,5320,5359,5733,5743,6279,6280,7098,7128,7305,8638,9447,11117,22841,22861,23180,23643,27250,54209,54502,55450,55601,84034,115362,118788,120892,222236,388125	ADORA2B,ALOX5AP,C3,CD14,CD81,F2RL1,GBP2,HCK,HSPA1B,IFI16,IL6,IDO1,LGALS1,LTF,MDK,MMP12,MNDA,SERPINE1,PAK3,PENK,PGC,PLA2G2A,PLSCR1,PTGER3,PTGS2,S100A8,S100A9,TLR3,TNFAIP3,TYROBP,OASL,AIM2,EMILIN1,RAB11FIP2,NLRP1,RFTN1,LY96,PDCD4,TREM2,RBM47,CAMK2N1,DDX60,EMILIN2,GBP5,PIK3AP1,LRRK2,NAPEPLD,C2CD4B	48/397
10_Member	GO Biological Processes	GO:0050729	positive regulation of inflammatory response	-7.66785	-5.66564	136,241,718,975,3569,3620,3956,4192,5054,5320,5733,5743,6279,6280,7098,9447,22861,27250,54209,55450,120892,222236,388125	ADORA2B,ALOX5AP,C3,CD81,IL6,IDO1,LGALS1,MDK,SERPINE1,PLA2G2A,PTGER3,PTGS2,S100A8,S100A9,TLR3,AIM2,NLRP1,PDCD4,TREM2,CAMK2N1,LRRK2,NAPEPLD,C2CD4B	23/155
11_Summary	GO Biological Processes	GO:1903034	regulation of response to wounding	-18.041	-14.8966	301,348,710,928,1364,2150,2191,2243,2244,2266,2281,2316,4192,4638,5054,5055,5068,5270,5328,6558,6696,7057,7103,7128,7852,9076,9314,10979,11117,22875,50506,51330,53905,64094,83481,84034,84830,100506658,1311,2207,3569,5341	ANXA1,APOE,SERPING1,CD9,CLDN4,F2RL1,FAP,FGA,FGB,FGG,FKBP1B,FLNA,MDK,MYLK,SERPINE1,SERPINB2,REG3A,SERPINE2,PLAU,SLC12A2,SPP1,THBS1,TSPAN8,TNFAIP3,CXCR4,CLDN1,KLF4,FERMT2,EMILIN1,ENPP4,DUOX2,TNFRSF12A,DUOX1,SMOC2,EPPK1,EMILIN2,ADTRP,OCLN,COMP,FCER1G,IL6,PLEK	42/-
11_Member	GO Biological Processes	GO:1903034	regulation of response to wounding	-18.041	-14.8966	301,348,710,928,1364,2150,2191,2243,2244,2266,2281,2316,4192,4638,5054,5055,5068,5270,5328,6558,6696,7057,7103,7128,7852,9076,9314,10979,11117,22875,50506,51330,53905,64094,83481,84034,84830,100506658	ANXA1,APOE,SERPING1,CD9,CLDN4,F2RL1,FAP,FGA,FGB,FGG,FKBP1B,FLNA,MDK,MYLK,SERPINE1,SERPINB2,REG3A,SERPINE2,PLAU,SLC12A2,SPP1,THBS1,TSPAN8,TNFAIP3,CXCR4,CLDN1,KLF4,FERMT2,EMILIN1,ENPP4,DUOX2,TNFRSF12A,DUOX1,SMOC2,EPPK1,EMILIN2,ADTRP,OCLN	38/173
11_Member	GO Biological Processes	GO:0061041	regulation of wound healing	-17.147	-14.0289	301,348,710,928,1364,2150,2191,2243,2244,2266,4638,5054,5055,5068,5270,5328,6558,7057,7103,7128,7852,9076,10979,11117,22875,50506,51330,53905,64094,83481,84034,84830,100506658	ANXA1,APOE,SERPING1,CD9,CLDN4,F2RL1,FAP,FGA,FGB,FGG,MYLK,SERPINE1,SERPINB2,REG3A,SERPINE2,PLAU,SLC12A2,THBS1,TSPAN8,TNFAIP3,CXCR4,CLDN1,FERMT2,EMILIN1,ENPP4,DUOX2,TNFRSF12A,DUOX1,SMOC2,EPPK1,EMILIN2,ADTRP,OCLN	33/136
11_Member	GO Biological Processes	GO:1903036	positive regulation of response to wounding	-11.366	-8.99971	301,1364,2281,2316,4192,4638,5054,5068,5328,7057,7852,9076,10979,11117,22875,50506,53905,64094,84034,100506658	ANXA1,CLDN4,FKBP1B,FLNA,MDK,MYLK,SERPINE1,REG3A,PLAU,THBS1,CXCR4,CLDN1,FERMT2,EMILIN1,ENPP4,DUOX2,DUOX1,SMOC2,EMILIN2,OCLN	20/76
11_Member	GO Biological Processes	GO:1900046	regulation of hemostasis	-10.9716	-8.63169	348,710,928,1311,2150,2191,2243,2244,2266,5054,5055,5270,5328,7057,7103,11117,22875,84034,84830	APOE,SERPING1,CD9,COMP,F2RL1,FAP,FGA,FGB,FGG,SERPINE1,SERPINB2,SERPINE2,PLAU,THBS1,TSPAN8,EMILIN1,ENPP4,EMILIN2,ADTRP	19/71
11_Member	GO Biological Processes	GO:0030193	regulation of blood coagulation	-10.2263	-7.99833	348,710,928,2150,2191,2243,2244,2266,5054,5055,5270,5328,7057,7103,11117,22875,84034,84830	APOE,SERPING1,CD9,F2RL1,FAP,FGA,FGB,FGG,SERPINE1,SERPINB2,SERPINE2,PLAU,THBS1,TSPAN8,EMILIN1,ENPP4,EMILIN2,ADTRP	18/69
11_Member	GO Biological Processes	GO:0090303	positive regulation of wound healing	-10.0695	-7.85772	301,1364,4638,5054,5068,5328,7057,7852,9076,10979,11117,22875,50506,53905,64094,84034,100506658	ANXA1,CLDN4,MYLK,SERPINE1,REG3A,PLAU,THBS1,CXCR4,CLDN1,FERMT2,EMILIN1,ENPP4,DUOX2,DUOX1,SMOC2,EMILIN2,OCLN	17/62
11_Member	GO Biological Processes	GO:0050818	regulation of coagulation	-9.67884	-7.50347	348,710,928,2150,2191,2243,2244,2266,5054,5055,5270,5328,7057,7103,11117,22875,84034,84830	APOE,SERPING1,CD9,F2RL1,FAP,FGA,FGB,FGG,SERPINE1,SERPINB2,SERPINE2,PLAU,THBS1,TSPAN8,EMILIN1,ENPP4,EMILIN2,ADTRP	18/74
11_Member	GO Biological Processes	GO:1900047	negative regulation of hemostasis	-8.02418	-5.98312	348,710,928,1311,2243,2244,2266,5054,5055,5270,5328,7103,84830	APOE,SERPING1,CD9,COMP,FGA,FGB,FGG,SERPINE1,SERPINB2,SERPINE2,PLAU,TSPAN8,ADTRP	13/46
11_Member	GO Biological Processes	GO:1903035	negative regulation of response to wounding	-7.18072	-5.24546	348,710,928,2243,2244,2266,4192,5054,5055,5068,5270,5328,6558,6696,7103,83481,84830	APOE,SERPING1,CD9,FGA,FGB,FGG,MDK,SERPINE1,SERPINB2,REG3A,SERPINE2,PLAU,SLC12A2,SPP1,TSPAN8,EPPK1,ADTRP	17/93
11_Member	GO Biological Processes	GO:0030195	negative regulation of blood coagulation	-7.14276	-5.21404	348,710,928,2243,2244,2266,5054,5055,5270,5328,7103,84830	APOE,SERPING1,CD9,FGA,FGB,FGG,SERPINE1,SERPINB2,SERPINE2,PLAU,TSPAN8,ADTRP	12/45
11_Member	GO Biological Processes	GO:0050819	negative regulation of coagulation	-6.69708	-4.82877	348,710,928,2243,2244,2266,5054,5055,5270,5328,7103,84830	APOE,SERPING1,CD9,FGA,FGB,FGG,SERPINE1,SERPINB2,SERPINE2,PLAU,TSPAN8,ADTRP	12/49
11_Member	GO Biological Processes	GO:0061045	negative regulation of wound healing	-6.2916	-4.48212	348,710,928,2243,2244,2266,5054,5055,5270,5328,6558,7103,83481,84830	APOE,SERPING1,CD9,FGA,FGB,FGG,SERPINE1,SERPINB2,SERPINE2,PLAU,SLC12A2,TSPAN8,EPPK1,ADTRP	14/73
11_Member	GO Biological Processes	GO:0010543	regulation of platelet activation	-4.67496	-3.09931	348,928,2207,2266,2316,3569,5270,5341,11117,84034	APOE,CD9,FCER1G,FGG,FLNA,IL6,SERPINE2,PLEK,EMILIN1,EMILIN2	10/52
11_Member	GO Biological Processes	GO:0090330	regulation of platelet aggregation	-3.1081	-1.83256	928,2266,3569,5270,11117,84034	CD9,FGG,IL6,SERPINE2,EMILIN1,EMILIN2	6/30
11_Member	GO Biological Processes	GO:0034110	regulation of homotypic cell-cell adhesion	-2.61287	-1.43882	928,2266,3569,5270,11117,84034	CD9,FGG,IL6,SERPINE2,EMILIN1,EMILIN2	6/37
11_Member	GO Biological Processes	GO:0010544	negative regulation of platelet activation	-2.303	-1.20583	348,928,2266,5270	APOE,CD9,FGG,SERPINE2	4/19
12_Summary	Canonical Pathways	M5885	NABA MATRISOME ASSOCIATED	-16.6395	-13.5697	12,301,309,710,713,714,871,1469,1508,1510,1513,1514,1522,2252,2487,2919,2920,3373,3479,3569,3576,3624,3627,3956,4016,4192,4283,4316,4318,4321,4588,5054,5055,5068,5104,5125,5176,5267,5268,5270,5274,5328,5654,5967,6275,6279,6280,6281,6286,6347,6355,6362,6423,6424,7052,7076,7077,7424,9507,10154,10371,10563,10673,10863,11167,11199,23129,23213,23452,25884,26585,27329,50856,55959,56477,56999,64175,8031…	SERPINA3,ANXA1,ANXA6,SERPING1,C1QB,C1QC,SERPINH1,CST1,CTSB,CTSE,CTSK,CTSL,CTSZ,FGF7,FRZB,CXCL1,CXCL2,HYAL1,IGF1,IL6,CXCL8,INHBA,CXCL10,LGALS1,LOXL1,MDK,CXCL9,MMP7,MMP9,MMP12,MUC6,SERPINE1,SERPINB2,REG3A,SERPINA5,PCSK5,SERPINF1,SERPINA4,SERPINB5,SERPINE2,SERPINI1,PLAU,HTRA1,REG1A,S100A4,S100A8,S100A9,S100A10,S100P,CCL2,CCL8,CCL18,SFRP2,SFRP4,TGM2,TIMP1,TIMP2,VEGFC,ADAMTS4,PLXNC1,SEMA3A,CXCL13,TNFS…	81/-
12_Member	Canonical Pathways	M5885	NABA MATRISOME ASSOCIATED	-16.6395	-13.5697	12,301,309,710,713,714,871,1469,1508,1510,1513,1514,1522,2252,2487,2919,2920,3373,3479,3569,3576,3624,3627,3956,4016,4192,4283,4316,4318,4321,4588,5054,5055,5068,5104,5125,5176,5267,5268,5270,5274,5328,5654,5967,6275,6279,6280,6281,6286,6347,6355,6362,6423,6424,7052,7076,7077,7424,9507,10154,10371,10563,10673,10863,11167,11199,23129,23213,23452,25884,26585,27329,50856,55959,56477,56999,64175,8031…	SERPINA3,ANXA1,ANXA6,SERPING1,C1QB,C1QC,SERPINH1,CST1,CTSB,CTSE,CTSK,CTSL,CTSZ,FGF7,FRZB,CXCL1,CXCL2,HYAL1,IGF1,IL6,CXCL8,INHBA,CXCL10,LGALS1,LOXL1,MDK,CXCL9,MMP7,MMP9,MMP12,MUC6,SERPINE1,SERPINB2,REG3A,SERPINA5,PCSK5,SERPINF1,SERPINA4,SERPINB5,SERPINE2,SERPINI1,PLAU,HTRA1,REG1A,S100A4,S100A8,S100A9,S100A10,S100P,CCL2,CCL8,CCL18,SFRP2,SFRP4,TGM2,TIMP1,TIMP2,VEGFC,ADAMTS4,PLXNC1,SEMA3A,CXCL13,TNFS…	81/751
12_Member	Canonical Pathways	M3468	NABA ECM REGULATORS	-10.5436	-8.28145	12,710,871,1469,1508,1510,1513,1514,1522,3373,4016,4316,4318,4321,5054,5055,5104,5125,5176,5267,5268,5270,5274,5328,5654,7052,7076,7077,9507,10863,23213,55959,56999,64175	SERPINA3,SERPING1,SERPINH1,CST1,CTSB,CTSE,CTSK,CTSL,CTSZ,HYAL1,LOXL1,MMP7,MMP9,MMP12,SERPINE1,SERPINB2,SERPINA5,PCSK5,SERPINF1,SERPINA4,SERPINB5,SERPINE2,SERPINI1,PLAU,HTRA1,TGM2,TIMP1,TIMP2,ADAMTS4,ADAM28,SULF1,SULF2,ADAMTS9,P3H1	34/238
13_Summary	GO Biological Processes	GO:0035239	tube morphogenesis	-16.53	-13.4885	187,283,348,800,1000,1012,1281,1282,1284,1311,1522,1545,1909,2191,2296,2316,2335,2348,2535,2626,2627,2752,2876,3162,3169,3248,3576,3953,4211,4223,4609,4638,5054,5216,5396,5567,5743,6347,6423,6491,6935,7045,7052,7057,7070,7291,7424,7837,7852,9353,9451,9464,10052,10451,10551,23129,23554,25902,25928,26585,27286,27329,51330,56999,57007,60681,79191,80004,83478,84830,84870,115908,147372,153572,221981,2…	APLNR,ANG,APOE,CALD1,CDH2,CDH13,COL3A1,COL4A1,COL4A2,COMP,CTSZ,CYP1B1,EDNRA,FAP,FOXC1,FLNA,FN1,FOLR1,FZD2,GATA4,GATA6,GLUL,GPX1,HMOX1,FOXA1,HPGD,CXCL8,LEPR,MEIS1,MEOX2,MYC,MYLK,SERPINE1,PFN1,PRRX1,PRKACB,PTGS2,CCL2,SFRP2,STIL,ZEB1,TGFBI,TGM2,THBS1,THY1,TWIST1,VEGFC,PXDN,CXCR4,SLIT2,EIF2AK3,HAND2,GJC1,VAV3,AGR2,PLXND1,TSPAN12,MTHFD1L,SOSTDC1,GREM1,SRPX2,ANGPTL3,TNFRSF12A,ADAMTS9,ACKR3,FKBP10,IRX3,…	83/-
13_Member	GO Biological Processes	GO:0035239	tube morphogenesis	-16.53	-13.4885	187,283,348,800,1000,1012,1281,1282,1284,1311,1522,1545,1909,2191,2296,2316,2335,2348,2535,2626,2627,2752,2876,3162,3169,3248,3576,3953,4211,4223,4609,4638,5054,5216,5396,5567,5743,6347,6423,6491,6935,7045,7052,7057,7070,7291,7424,7837,7852,9353,9451,9464,10052,10451,10551,23129,23554,25902,25928,26585,27286,27329,51330,56999,57007,60681,79191,80004,83478,84830,84870,115908,147372,153572,221981,2…	APLNR,ANG,APOE,CALD1,CDH2,CDH13,COL3A1,COL4A1,COL4A2,COMP,CTSZ,CYP1B1,EDNRA,FAP,FOXC1,FLNA,FN1,FOLR1,FZD2,GATA4,GATA6,GLUL,GPX1,HMOX1,FOXA1,HPGD,CXCL8,LEPR,MEIS1,MEOX2,MYC,MYLK,SERPINE1,PFN1,PRRX1,PRKACB,PTGS2,CCL2,SFRP2,STIL,ZEB1,TGFBI,TGM2,THBS1,THY1,TWIST1,VEGFC,PXDN,CXCR4,SLIT2,EIF2AK3,HAND2,GJC1,VAV3,AGR2,PLXND1,TSPAN12,MTHFD1L,SOSTDC1,GREM1,SRPX2,ANGPTL3,TNFRSF12A,ADAMTS9,ACKR3,FKBP10,IRX3,…	76/679
13_Member	GO Biological Processes	GO:0001568	blood vessel development	-16.1099	-13.1415	187,283,348,358,800,1000,1012,1277,1278,1281,1282,1284,1289,1311,1545,1649,1909,2191,2296,2316,2335,2348,2627,2752,2876,3162,3248,3576,3953,4016,4211,4223,4638,5054,5396,5743,6347,6423,7045,7057,7070,7424,7837,9021,9353,9451,9464,10052,10451,23129,23554,26585,27286,27329,51330,56999,57007,60681,83478,84830,84870,147372,221981,284340	APLNR,ANG,APOE,AQP1,CALD1,CDH2,CDH13,COL1A1,COL1A2,COL3A1,COL4A1,COL4A2,COL5A1,COMP,CYP1B1,DDIT3,EDNRA,FAP,FOXC1,FLNA,FN1,FOLR1,GATA6,GLUL,GPX1,HMOX1,HPGD,CXCL8,LEPR,LOXL1,MEIS1,MEOX2,MYLK,SERPINE1,PRRX1,PTGS2,CCL2,SFRP2,TGFBI,THBS1,THY1,VEGFC,PXDN,SOCS3,SLIT2,EIF2AK3,HAND2,GJC1,VAV3,PLXND1,TSPAN12,GREM1,SRPX2,ANGPTL3,TNFRSF12A,ADAMTS9,ACKR3,FKBP10,ARHGAP24,ADTRP,RSPO3,CCBE1,THSD7A,CXCL17	64/517
13_Member	GO Biological Processes	GO:0001944	vasculature development	-15.3397	-12.4825	187,283,348,358,800,1000,1012,1277,1278,1281,1282,1284,1289,1311,1545,1649,1909,2191,2296,2316,2335,2348,2627,2752,2876,3162,3248,3576,3953,4016,4211,4223,4638,5054,5396,5743,6347,6423,7045,7057,7070,7424,7837,9021,9353,9451,9464,10052,10451,23129,23554,26585,27286,27329,51330,56999,57007,60681,83478,84830,84870,147372,221981,284340	APLNR,ANG,APOE,AQP1,CALD1,CDH2,CDH13,COL1A1,COL1A2,COL3A1,COL4A1,COL4A2,COL5A1,COMP,CYP1B1,DDIT3,EDNRA,FAP,FOXC1,FLNA,FN1,FOLR1,GATA6,GLUL,GPX1,HMOX1,HPGD,CXCL8,LEPR,LOXL1,MEIS1,MEOX2,MYLK,SERPINE1,PRRX1,PTGS2,CCL2,SFRP2,TGFBI,THBS1,THY1,VEGFC,PXDN,SOCS3,SLIT2,EIF2AK3,HAND2,GJC1,VAV3,PLXND1,TSPAN12,GREM1,SRPX2,ANGPTL3,TNFRSF12A,ADAMTS9,ACKR3,FKBP10,ARHGAP24,ADTRP,RSPO3,CCBE1,THSD7A,CXCL17	64/536
13_Member	GO Biological Processes	GO:0048514	blood vessel morphogenesis	-15.1302	-12.3614	187,283,348,800,1000,1012,1281,1282,1284,1311,1545,1909,2191,2296,2316,2335,2348,2752,2876,3162,3248,3576,3953,4211,4223,4638,5054,5396,5743,6347,6423,7045,7057,7070,7424,7837,9353,9451,9464,10052,10451,23129,23554,26585,27286,27329,51330,56999,57007,60681,83478,84830,84870,147372,221981,284340	APLNR,ANG,APOE,CALD1,CDH2,CDH13,COL3A1,COL4A1,COL4A2,COMP,CYP1B1,EDNRA,FAP,FOXC1,FLNA,FN1,FOLR1,GLUL,GPX1,HMOX1,HPGD,CXCL8,LEPR,MEIS1,MEOX2,MYLK,SERPINE1,PRRX1,PTGS2,CCL2,SFRP2,TGFBI,THBS1,THY1,VEGFC,PXDN,SLIT2,EIF2AK3,HAND2,GJC1,VAV3,PLXND1,TSPAN12,GREM1,SRPX2,ANGPTL3,TNFRSF12A,ADAMTS9,ACKR3,FKBP10,ARHGAP24,ADTRP,RSPO3,CCBE1,THSD7A,CXCL17	56/430
13_Member	GO Biological Processes	GO:0001525	angiogenesis	-12.7145	-10.1788	187,283,800,1012,1282,1284,1545,1909,2191,2296,2316,2335,2752,2876,3162,3576,3953,4211,4223,5054,5743,6347,6423,7045,7057,7070,7424,7837,9353,9451,9464,10451,23129,23554,26585,27286,27329,51330,57007,83478,84830,84870,147372,221981,284340	APLNR,ANG,CALD1,CDH13,COL4A1,COL4A2,CYP1B1,EDNRA,FAP,FOXC1,FLNA,FN1,GLUL,GPX1,HMOX1,CXCL8,LEPR,MEIS1,MEOX2,SERPINE1,PTGS2,CCL2,SFRP2,TGFBI,THBS1,THY1,VEGFC,PXDN,SLIT2,EIF2AK3,HAND2,VAV3,PLXND1,TSPAN12,GREM1,SRPX2,ANGPTL3,TNFRSF12A,ACKR3,ARHGAP24,ADTRP,RSPO3,CCBE1,THSD7A,CXCL17	45/336
14_Summary	GO Biological Processes	GO:0045765	regulation of angiogenesis	-16.5148	-13.4885	187,358,718,719,727,1116,1284,1536,1545,2296,2626,2627,2752,3087,3162,3315,3373,3569,3576,3627,4192,5054,5176,5579,5740,6423,6558,6678,7057,7058,7060,7098,7128,7291,7424,7852,9314,10457,10563,11117,23129,23213,23554,26585,27329,51738,55333,56999,64094,84034,140862,147372	APLNR,AQP1,C3,C3AR1,C5,CHI3L1,COL4A2,CYBB,CYP1B1,FOXC1,GATA4,GATA6,GLUL,HHEX,HMOX1,HSPB1,HYAL1,IL6,CXCL8,CXCL10,MDK,SERPINE1,SERPINF1,PRKCB,PTGIS,SFRP2,SLC12A2,SPARC,THBS1,THBS2,THBS4,TLR3,TNFAIP3,TWIST1,VEGFC,CXCR4,KLF4,GPNMB,CXCL13,EMILIN1,PLXND1,SULF1,TSPAN12,GREM1,ANGPTL3,GHRL,SYNJ2BP,ADAMTS9,SMOC2,EMILIN2,ISM1,CCBE1	52/-
14_Member	GO Biological Processes	GO:0045765	regulation of angiogenesis	-16.5148	-13.4885	187,358,718,719,727,1116,1284,1536,1545,2296,2626,2627,2752,3087,3162,3315,3373,3569,3576,3627,4192,5054,5176,5579,5740,6423,6558,6678,7057,7058,7060,7098,7128,7291,7424,7852,9314,10457,10563,11117,23129,23213,23554,26585,27329,51738,55333,56999,64094,84034,140862,147372	APLNR,AQP1,C3,C3AR1,C5,CHI3L1,COL4A2,CYBB,CYP1B1,FOXC1,GATA4,GATA6,GLUL,HHEX,HMOX1,HSPB1,HYAL1,IL6,CXCL8,CXCL10,MDK,SERPINE1,SERPINF1,PRKCB,PTGIS,SFRP2,SLC12A2,SPARC,THBS1,THBS2,THBS4,TLR3,TNFAIP3,TWIST1,VEGFC,CXCR4,KLF4,GPNMB,CXCL13,EMILIN1,PLXND1,SULF1,TSPAN12,GREM1,ANGPTL3,GHRL,SYNJ2BP,ADAMTS9,SMOC2,EMILIN2,ISM1,CCBE1	52/350
14_Member	GO Biological Processes	GO:1901342	regulation of vasculature development	-16.1947	-13.2078	187,358,718,719,727,1116,1284,1536,1545,2296,2626,2627,2752,3087,3162,3315,3373,3569,3576,3627,4192,5054,5176,5579,5740,6423,6558,6678,7057,7058,7060,7098,7128,7291,7424,7852,9314,10457,10563,11117,23129,23213,23554,26585,27329,51738,55333,56999,64094,84034,140862,147372	APLNR,AQP1,C3,C3AR1,C5,CHI3L1,COL4A2,CYBB,CYP1B1,FOXC1,GATA4,GATA6,GLUL,HHEX,HMOX1,HSPB1,HYAL1,IL6,CXCL8,CXCL10,MDK,SERPINE1,SERPINF1,PRKCB,PTGIS,SFRP2,SLC12A2,SPARC,THBS1,THBS2,THBS4,TLR3,TNFAIP3,TWIST1,VEGFC,CXCR4,KLF4,GPNMB,CXCL13,EMILIN1,PLXND1,SULF1,TSPAN12,GREM1,ANGPTL3,GHRL,SYNJ2BP,ADAMTS9,SMOC2,EMILIN2,ISM1,CCBE1	52/356
14_Member	GO Biological Processes	GO:0045766	positive regulation of angiogenesis	-12.2352	-9.7617	187,358,718,719,727,1116,1536,1545,2626,2627,3162,3315,3373,3576,4192,5054,5579,5740,6423,7057,7098,7291,7424,7852,9314,11117,26585,27329,51738,64094,84034,147372	APLNR,AQP1,C3,C3AR1,C5,CHI3L1,CYBB,CYP1B1,GATA4,GATA6,HMOX1,HSPB1,HYAL1,CXCL8,MDK,SERPINE1,PRKCB,PTGIS,SFRP2,THBS1,TLR3,TWIST1,VEGFC,CXCR4,KLF4,EMILIN1,GREM1,ANGPTL3,GHRL,SMOC2,EMILIN2,CCBE1	32/185
14_Member	GO Biological Processes	GO:1904018	positive regulation of vasculature development	-12.2352	-9.7617	187,358,718,719,727,1116,1536,1545,2626,2627,3162,3315,3373,3576,4192,5054,5579,5740,6423,7057,7098,7291,7424,7852,9314,11117,26585,27329,51738,64094,84034,147372	APLNR,AQP1,C3,C3AR1,C5,CHI3L1,CYBB,CYP1B1,GATA4,GATA6,HMOX1,HSPB1,HYAL1,CXCL8,MDK,SERPINE1,PRKCB,PTGIS,SFRP2,THBS1,TLR3,TWIST1,VEGFC,CXCR4,KLF4,EMILIN1,GREM1,ANGPTL3,GHRL,SMOC2,EMILIN2,CCBE1	32/185
14_Member	GO Biological Processes	GO:0016525	negative regulation of angiogenesis	-4.77203	-3.18569	1284,2296,3087,3627,5054,5176,6558,6678,7057,7058,7060,9314,11117,23213,51738,55333,56999,140862	COL4A2,FOXC1,HHEX,CXCL10,SERPINE1,SERPINF1,SLC12A2,SPARC,THBS1,THBS2,THBS4,KLF4,EMILIN1,SULF1,GHRL,SYNJ2BP,ADAMTS9,ISM1	18/151
14_Member	GO Biological Processes	GO:2000181	negative regulation of blood vessel morphogenesis	-4.69367	-3.11596	1284,2296,3087,3627,5054,5176,6558,6678,7057,7058,7060,9314,11117,23213,51738,55333,56999,140862	COL4A2,FOXC1,HHEX,CXCL10,SERPINE1,SERPINF1,SLC12A2,SPARC,THBS1,THBS2,THBS4,KLF4,EMILIN1,SULF1,GHRL,SYNJ2BP,ADAMTS9,ISM1	18/153
14_Member	GO Biological Processes	GO:1901343	negative regulation of vasculature development	-4.65505	-3.08464	1284,2296,3087,3627,5054,5176,6558,6678,7057,7058,7060,9314,11117,23213,51738,55333,56999,140862	COL4A2,FOXC1,HHEX,CXCL10,SERPINE1,SERPINF1,SLC12A2,SPARC,THBS1,THBS2,THBS4,KLF4,EMILIN1,SULF1,GHRL,SYNJ2BP,ADAMTS9,ISM1	18/154
15_Summary	GO Biological Processes	GO:0009617	response to bacterium	-16.2108	-13.2078	131,210,283,358,496,718,929,999,1113,1673,1728,2207,2243,2244,2634,2876,2919,2920,3055,3158,3248,3493,3512,3569,3576,3620,3627,3764,4016,4057,4283,4360,5054,5068,5142,5179,5319,5320,5618,5743,5919,5996,6035,6038,6279,6280,6338,6347,6401,7098,7128,7348,7412,9076,9450,9590,9636,10288,10563,11221,22861,23643,27250,51316,54209,54210,55876,55971,56999,83872,84419,115362,151887,200504,342979,654463,100…	ADH7,ALAD,ANG,AQP1,ATP4B,C3,CD14,CDH1,CHGA,DEFB4A,NQO1,FCER1G,FGA,FGB,GBP2,GPX1,CXCL1,CXCL2,HCK,HMGCS2,HPGD,IGHA1,JCHAIN,IL6,CXCL8,IDO1,CXCL10,KCNJ8,LOXL1,LTF,CXCL9,MRC1,SERPINE1,REG3A,PDE4B,PENK,PLA2G1B,PLA2G2A,PRLR,PTGS2,RARRES2,RGS1,RNASE1,RNASE4,S100A8,S100A9,SCNN1B,CCL2,SELE,TLR3,TNFAIP3,UPK1B,VCAM1,CLDN1,LY86,AKAP12,ISG15,LILRB2,CXCL13,DUSP10,NLRP1,LY96,PDCD4,PLAC8,TREM2,TREM1,GSDMB,BAIAP2L…	114/-
15_Member	GO Biological Processes	GO:0009617	response to bacterium	-16.2108	-13.2078	131,210,283,358,496,718,929,999,1113,1673,1728,2207,2243,2244,2634,2876,2919,2920,3055,3158,3248,3493,3512,3569,3576,3620,3627,3764,4016,4057,4283,4360,5054,5068,5142,5179,5319,5320,5618,5743,5919,5996,6035,6038,6279,6280,6338,6347,6401,7098,7128,7348,7412,9076,9450,9590,9636,10288,10563,11221,22861,23643,27250,51316,54209,54210,55876,55971,56999,83872,84419,115362,151887,200504,342979,654463,100…	ADH7,ALAD,ANG,AQP1,ATP4B,C3,CD14,CDH1,CHGA,DEFB4A,NQO1,FCER1G,FGA,FGB,GBP2,GPX1,CXCL1,CXCL2,HCK,HMGCS2,HPGD,IGHA1,JCHAIN,IL6,CXCL8,IDO1,CXCL10,KCNJ8,LOXL1,LTF,CXCL9,MRC1,SERPINE1,REG3A,PDE4B,PENK,PLA2G1B,PLA2G2A,PRLR,PTGS2,RARRES2,RGS1,RNASE1,RNASE4,S100A8,S100A9,SCNN1B,CCL2,SELE,TLR3,TNFAIP3,UPK1B,VCAM1,CLDN1,LY86,AKAP12,ISG15,LILRB2,CXCL13,DUSP10,NLRP1,LY96,PDCD4,PLAC8,TREM2,TREM1,GSDMB,BAIAP2L…	77/703
15_Member	GO Biological Processes	GO:0045087	innate immune response	-8.87763	-6.77458	283,301,361,481,684,710,713,714,715,716,718,727,729,929,1113,1536,1673,1728,2150,2207,2214,2243,2244,2537,2634,2852,3055,3426,3428,3433,3434,3512,3627,4057,4360,4688,5319,5873,5919,6279,6280,6347,6355,6362,7098,8519,8638,9076,9447,9450,9582,9636,10155,10410,10581,22861,23643,27293,50856,54210,55061,55601,55646,115362,203068	ANG,ANXA1,AQP4,ATP1B1,BST2,SERPING1,C1QB,C1QC,C1R,C1S,C3,C5,C6,CD14,CHGA,CYBB,DEFB4A,NQO1,F2RL1,FCER1G,FCGR3A,FGA,FGB,IFI6,GBP2,GPER1,HCK,CFI,IFI16,IFIT2,IFIT1,JCHAIN,CXCL10,LTF,MRC1,NCF2,PLA2G1B,RAB27A,RARRES2,S100A8,S100A9,CCL2,CCL8,CCL18,TLR3,IFITM1,OASL,CLDN1,AIM2,LY86,APOBEC3B,ISG15,TRIM28,IFITM3,IFITM2,NLRP1,LY96,SMPDL3B,CLEC4A,TREM1,SUSD4,DDX60,LYAR,GBP5,TUBB	65/767
15_Member	GO Biological Processes	GO:0042742	defense response to bacterium	-5.8543	-4.10563	283,358,1113,1673,2207,2243,2244,2634,3493,3512,3569,4057,5054,5319,5320,5919,6035,6038,6279,6280,6338,7098,9636,10563,22861,51316,54209,54210,55876,115362	ANG,AQP1,CHGA,DEFB4A,FCER1G,FGA,FGB,GBP2,IGHA1,JCHAIN,IL6,LTF,SERPINE1,PLA2G1B,PLA2G2A,RARRES2,RNASE1,RNASE4,S100A8,S100A9,SCNN1B,TLR3,ISG15,CXCL13,NLRP1,PLAC8,TREM2,TREM1,GSDMB,GBP5	30/300
16_Summary	GO Biological Processes	GO:0001501	skeletal system development	-16.0812	-13.1306	309,633,871,960,1009,1116,1277,1278,1280,1281,1290,1300,1301,1311,1909,2200,2296,2487,2697,3212,3216,3217,3223,3373,3479,3638,3953,4054,4057,4256,4318,4982,5125,5191,5396,6423,6424,6935,7045,7052,7076,7227,7291,7298,9451,9464,9507,10234,10265,23213,25884,25902,29887,51715,51738,55512,55959,64131,64175,80781,91461,116039,1289,3158,3169,5019,6097,140606	ANXA6,BGN,SERPINH1,CD44,CDH11,CHI3L1,COL1A1,COL1A2,COL2A1,COL3A1,COL5A2,COL10A1,COL11A1,COMP,EDNRA,FBN1,FOXC1,FRZB,GJA1,HOXB2,HOXB6,HOXB7,HOXC6,HYAL1,IGF1,INSIG1,LEPR,LTBP3,LTF,MGP,MMP9,TNFRSF11B,PCSK5,PEX7,PRRX1,SFRP2,SFRP4,ZEB1,TGFBI,TGM2,TIMP1,TRPS1,TWIST1,TYMS,EIF2AK3,HAND2,ADAMTS4,LRRC17,IRX5,SULF1,CHRDL2,MTHFD1L,SNX10,RAB23,GHRL,SMPD3,SULF2,XYLT1,P3H1,COL18A1,PKDCC,OSR2,COL5A1,HMGCS2,FOXA1,…	68/-
16_Member	GO Biological Processes	GO:0001501	skeletal system development	-16.0812	-13.1306	309,633,871,960,1009,1116,1277,1278,1280,1281,1290,1300,1301,1311,1909,2200,2296,2487,2697,3212,3216,3217,3223,3373,3479,3638,3953,4054,4057,4256,4318,4982,5125,5191,5396,6423,6424,6935,7045,7052,7076,7227,7291,7298,9451,9464,9507,10234,10265,23213,25884,25902,29887,51715,51738,55512,55959,64131,64175,80781,91461,116039	ANXA6,BGN,SERPINH1,CD44,CDH11,CHI3L1,COL1A1,COL1A2,COL2A1,COL3A1,COL5A2,COL10A1,COL11A1,COMP,EDNRA,FBN1,FOXC1,FRZB,GJA1,HOXB2,HOXB6,HOXB7,HOXC6,HYAL1,IGF1,INSIG1,LEPR,LTBP3,LTF,MGP,MMP9,TNFRSF11B,PCSK5,PEX7,PRRX1,SFRP2,SFRP4,ZEB1,TGFBI,TGM2,TIMP1,TRPS1,TWIST1,TYMS,EIF2AK3,HAND2,ADAMTS4,LRRC17,IRX5,SULF1,CHRDL2,MTHFD1L,SNX10,RAB23,GHRL,SMPD3,SULF2,XYLT1,P3H1,COL18A1,PKDCC,OSR2	62/490
16_Member	GO Biological Processes	GO:0061448	connective tissue development	-10.4604	-8.20846	309,633,871,960,1116,1277,1280,1281,1289,1301,1311,3158,3169,3373,4054,4256,5019,5396,6097,6423,6935,7045,7076,7298,9451,9464,23213,25884,51738,55512,55959,116039,140606	ANXA6,BGN,SERPINH1,CD44,CHI3L1,COL1A1,COL2A1,COL3A1,COL5A1,COL11A1,COMP,HMGCS2,FOXA1,HYAL1,LTBP3,MGP,OXCT1,PRRX1,RORC,SFRP2,ZEB1,TGFBI,TIMP1,TYMS,EIF2AK3,HAND2,SULF1,CHRDL2,GHRL,SMPD3,SULF2,OSR2,SELENOM	33/227
16_Member	GO Biological Processes	GO:0051216	cartilage development	-9.49951	-7.33564	309,633,871,960,1116,1277,1280,1281,1301,1311,3373,4054,4256,5396,6423,6935,7045,7076,7298,9451,9464,23213,25884,51738,55512,55959,116039	ANXA6,BGN,SERPINH1,CD44,CHI3L1,COL1A1,COL2A1,COL3A1,COL11A1,COMP,HYAL1,LTBP3,MGP,PRRX1,SFRP2,ZEB1,TGFBI,TIMP1,TYMS,EIF2AK3,HAND2,SULF1,CHRDL2,GHRL,SMPD3,SULF2,OSR2	27/171
16_Member	GO Biological Processes	GO:0060348	bone development	-8.36213	-6.29688	309,633,871,1277,1280,1281,1311,2296,2697,3479,3638,3953,4054,4057,5191,6424,7052,7291,10234,23213,29887,51715,55512,55959,64131,64175,116039	ANXA6,BGN,SERPINH1,COL1A1,COL2A1,COL3A1,COMP,FOXC1,GJA1,IGF1,INSIG1,LEPR,LTBP3,LTF,PEX7,SFRP4,TGM2,TWIST1,LRRC17,SULF1,SNX10,RAB23,SMPD3,SULF2,XYLT1,P3H1,OSR2	27/192
16_Member	GO Biological Processes	GO:0048705	skeletal system morphogenesis	-6.26417	-4.46338	309,871,1277,1280,1281,1301,1311,2296,3212,3216,3217,3373,3638,4054,4057,4256,5191,5396,6424,6935,7291,10265,25902,51715,55512,116039	ANXA6,SERPINH1,COL1A1,COL2A1,COL3A1,COL11A1,COMP,FOXC1,HOXB2,HOXB6,HOXB7,HYAL1,INSIG1,LTBP3,LTF,MGP,PEX7,PRRX1,SFRP4,ZEB1,TWIST1,IRX5,MTHFD1L,RAB23,SMPD3,OSR2	26/227
16_Member	GO Biological Processes	GO:0060349	bone morphogenesis	-6.1002	-4.31867	309,871,1277,1280,1281,1311,2296,3638,4054,4057,5191,6424,7291,51715,55512,116039	ANXA6,SERPINH1,COL1A1,COL2A1,COL3A1,COMP,FOXC1,INSIG1,LTBP3,LTF,PEX7,SFRP4,TWIST1,RAB23,SMPD3,OSR2	16/98
16_Member	GO Biological Processes	GO:0002062	chondrocyte differentiation	-5.65452	-3.9323	309,871,1280,1281,1301,1311,4054,6423,7045,9451,23213,55512,55959,116039	ANXA6,SERPINH1,COL2A1,COL3A1,COL11A1,COMP,LTBP3,SFRP2,TGFBI,EIF2AK3,SULF1,SMPD3,SULF2,OSR2	14/82
16_Member	GO Biological Processes	GO:0002063	chondrocyte development	-5.3264	-3.66179	871,1301,1311,6423,9451,23213,55512,55959	SERPINH1,COL11A1,COMP,SFRP2,EIF2AK3,SULF1,SMPD3,SULF2	8/27
16_Member	GO Biological Processes	GO:0060350	endochondral bone morphogenesis	-3.45917	-2.10184	309,871,1277,1280,1281,1311,2296,5191,55512	ANXA6,SERPINH1,COL1A1,COL2A1,COL3A1,COMP,FOXC1,PEX7,SMPD3	9/59
16_Member	GO Biological Processes	GO:0060351	cartilage development involved in endochondral bone morphogenesis	-2.87922	-1.64793	309,871,1277,1280,1311,55512	ANXA6,SERPINH1,COL1A1,COL2A1,COMP,SMPD3	6/33
16_Member	GO Biological Processes	GO:0001958	endochondral ossification	-2.24346	-1.16114	1277,1280,2296,5191,55512	COL1A1,COL2A1,FOXC1,PEX7,SMPD3	5/31
16_Member	GO Biological Processes	GO:0036075	replacement ossification	-2.24346	-1.16114	1277,1280,2296,5191,55512	COL1A1,COL2A1,FOXC1,PEX7,SMPD3	5/31
17_Summary	GO Biological Processes	GO:0003013	circulatory system process	-15.9103	-12.9768	136,154,348,481,710,719,1113,1131,1278,1311,1522,1816,1909,2150,2243,2244,2266,2296,2627,2697,2852,2876,2982,2983,3162,3627,3672,3764,3784,3953,5125,5743,6296,6337,6338,6340,6446,6456,6506,6528,6558,6865,7424,7852,8671,9153,9194,9353,9365,9590,9992,10052,10057,10979,11117,23171,23327,26509,80852,84034,388125,100506658	ADORA2B,ADRB2,APOE,ATP1B1,SERPING1,C3AR1,CHGA,CHRM3,COL1A2,COMP,CTSZ,DRD5,EDNRA,F2RL1,FGA,FGB,FGG,FOXC1,GATA6,GJA1,GPER1,GPX1,GUCY1A1,GUCY1B1,HMOX1,CXCL10,ITGA1,KCNJ8,KCNQ1,LEPR,PCSK5,PTGS2,ACSM3,SCNN1A,SCNN1B,SCNN1G,SGK1,SH3GL2,SLC1A2,SLC5A5,SLC12A2,TACR2,VEGFC,CXCR4,SLC4A4,SLC28A2,SLC16A7,SLIT2,KL,AKAP12,KCNE2,GJC1,ABCC5,FERMT2,EMILIN1,GPD1L,NEDD4L,MYOF,GRIP2,EMILIN2,C2CD4B,OCLN	62/-
17_Member	GO Biological Processes	GO:0003013	circulatory system process	-15.9103	-12.9768	136,154,348,481,710,719,1113,1131,1278,1311,1522,1816,1909,2150,2243,2244,2266,2296,2627,2697,2852,2876,2982,2983,3162,3627,3672,3764,3784,3953,5125,5743,6296,6337,6338,6340,6446,6456,6506,6528,6558,6865,7424,7852,8671,9153,9194,9353,9365,9590,9992,10052,10057,10979,11117,23171,23327,26509,80852,84034,388125,100506658	ADORA2B,ADRB2,APOE,ATP1B1,SERPING1,C3AR1,CHGA,CHRM3,COL1A2,COMP,CTSZ,DRD5,EDNRA,F2RL1,FGA,FGB,FGG,FOXC1,GATA6,GJA1,GPER1,GPX1,GUCY1A1,GUCY1B1,HMOX1,CXCL10,ITGA1,KCNJ8,KCNQ1,LEPR,PCSK5,PTGS2,ACSM3,SCNN1A,SCNN1B,SCNN1G,SGK1,SH3GL2,SLC1A2,SLC5A5,SLC12A2,TACR2,VEGFC,CXCR4,SLC4A4,SLC28A2,SLC16A7,SLIT2,KL,AKAP12,KCNE2,GJC1,ABCC5,FERMT2,EMILIN1,GPD1L,NEDD4L,MYOF,GRIP2,EMILIN2,C2CD4B,OCLN	62/494
17_Member	GO Biological Processes	GO:0008015	blood circulation	-15.1895	-12.385	136,154,348,481,710,719,1113,1131,1278,1311,1522,1816,1909,2150,2243,2244,2266,2296,2627,2697,2852,2876,2982,2983,3162,3627,3672,3764,3784,5125,5743,6296,6337,6338,6340,6446,6456,6865,7424,7852,9353,9365,9590,9992,10052,10979,11117,23171,23327,26509,80852,84034,388125,100506658	ADORA2B,ADRB2,APOE,ATP1B1,SERPING1,C3AR1,CHGA,CHRM3,COL1A2,COMP,CTSZ,DRD5,EDNRA,F2RL1,FGA,FGB,FGG,FOXC1,GATA6,GJA1,GPER1,GPX1,GUCY1A1,GUCY1B1,HMOX1,CXCL10,ITGA1,KCNJ8,KCNQ1,PCSK5,PTGS2,ACSM3,SCNN1A,SCNN1B,SCNN1G,SGK1,SH3GL2,TACR2,VEGFC,CXCR4,SLIT2,KL,AKAP12,KCNE2,GJC1,FERMT2,EMILIN1,GPD1L,NEDD4L,MYOF,GRIP2,EMILIN2,C2CD4B,OCLN	54/402
17_Member	GO Biological Processes	GO:0003018	vascular process in circulatory system	-9.7773	-7.59011	136,154,348,1131,1311,1816,1909,2150,2243,2244,2266,2296,2852,2876,2982,3672,3764,3953,5743,6338,6456,6506,6528,6558,6865,8671,9153,9194,9353,9590,10057,10979,80852,388125,100506658	ADORA2B,ADRB2,APOE,CHRM3,COMP,DRD5,EDNRA,F2RL1,FGA,FGB,FGG,FOXC1,GPER1,GPX1,GUCY1A1,ITGA1,KCNJ8,LEPR,PTGS2,SCNN1B,SH3GL2,SLC1A2,SLC5A5,SLC12A2,TACR2,SLC4A4,SLC28A2,SLC16A7,SLIT2,AKAP12,ABCC5,FERMT2,GRIP2,C2CD4B,OCLN	35/267
17_Member	GO Biological Processes	GO:0035296	regulation of tube diameter	-5.65658	-3.93334	136,154,348,1131,1311,1816,1909,2150,2243,2244,2266,2296,2852,2876,2982,3672,5743,6338,80852	ADORA2B,ADRB2,APOE,CHRM3,COMP,DRD5,EDNRA,F2RL1,FGA,FGB,FGG,FOXC1,GPER1,GPX1,GUCY1A1,ITGA1,PTGS2,SCNN1B,GRIP2	19/144
17_Member	GO Biological Processes	GO:0097746	blood vessel diameter maintenance	-5.65658	-3.93334	136,154,348,1131,1311,1816,1909,2150,2243,2244,2266,2296,2852,2876,2982,3672,5743,6338,80852	ADORA2B,ADRB2,APOE,CHRM3,COMP,DRD5,EDNRA,F2RL1,FGA,FGB,FGG,FOXC1,GPER1,GPX1,GUCY1A1,ITGA1,PTGS2,SCNN1B,GRIP2	19/144
17_Member	GO Biological Processes	GO:0008217	regulation of blood pressure	-5.63309	-3.91376	154,1113,1278,1522,1816,1909,2150,2982,3162,3784,5125,5743,6296,6337,6338,6340,6446,7424,9365,11117,80852,84034	ADRB2,CHGA,COL1A2,CTSZ,DRD5,EDNRA,F2RL1,GUCY1A1,HMOX1,KCNQ1,PCSK5,PTGS2,ACSM3,SCNN1A,SCNN1B,SCNN1G,SGK1,VEGFC,KL,EMILIN1,GRIP2,EMILIN2	22/186
17_Member	GO Biological Processes	GO:0035150	regulation of tube size	-5.61103	-3.89695	136,154,348,1131,1311,1816,1909,2150,2243,2244,2266,2296,2852,2876,2982,3672,5743,6338,80852	ADORA2B,ADRB2,APOE,CHRM3,COMP,DRD5,EDNRA,F2RL1,FGA,FGB,FGG,FOXC1,GPER1,GPX1,GUCY1A1,ITGA1,PTGS2,SCNN1B,GRIP2	19/145
17_Member	GO Biological Processes	GO:0042311	vasodilation	-3.40125	-2.05745	136,154,348,2150,2852,2876,2982,3672	ADORA2B,ADRB2,APOE,F2RL1,GPER1,GPX1,GUCY1A1,ITGA1	8/48
18_Summary	GO Biological Processes	GO:0032787	monocarboxylic acid metabolic process	-15.7386	-12.8372	33,35,36,126,131,216,229,241,549,686,718,1545,1558,1559,1562,1577,1645,1646,1962,2023,2110,2181,2876,2938,3033,3248,3418,3479,3620,3939,4199,5095,5191,5205,5214,5319,5740,5743,6296,6822,7366,8399,8644,10449,10455,10873,10998,11057,22949,25874,25902,27329,29785,51181,55902,60481,79071,79152,80221,84830,142827,148811,197257,100,635,1491,1718,2203,2752,2805,3158,3638,3706,3930,3953,4190,7108,8789,91…	ACADL,ACADS,ACADSB,ADH1C,ADH7,ALDH1A1,ALDOB,ALOX5AP,AUH,BTD,C3,CYP1B1,CYP2C8,CYP2C9,CYP2C18,CYP3A5,AKR1C1,AKR1C2,EHHADH,ENO1,ETFDH,ACSL3,GPX1,GSTA1,HADH,HPGD,IDH2,IGF1,IDO1,LDHA,ME1,PCCA,PEX7,ATP8B1,PFKP,PLA2G1B,PTGIS,PTGS2,ACSM3,SULT2A1,UGT2B15,PLA2G10,AKR1C3,ACAA2,ECI2,ME3,SLC27A5,ABHD2,PTGR1,MPC2,MTHFD1L,ANGPTL3,CYP2S1,DCXR,ACSS2,ELOVL5,ELOVL6,FA2H,ACSF2,ADTRP,ACSM6,PM20D1,LDHD,ADA,BHMT,CTH,DH…	88/-
18_Member	GO Biological Processes	GO:0032787	monocarboxylic acid metabolic process	-15.7386	-12.8372	33,35,36,126,131,216,229,241,549,686,718,1545,1558,1559,1562,1577,1645,1646,1962,2023,2110,2181,2876,2938,3033,3248,3418,3479,3620,3939,4199,5095,5191,5205,5214,5319,5740,5743,6296,6822,7366,8399,8644,10449,10455,10873,10998,11057,22949,25874,25902,27329,29785,51181,55902,60481,79071,79152,80221,84830,142827,148811,197257	ACADL,ACADS,ACADSB,ADH1C,ADH7,ALDH1A1,ALDOB,ALOX5AP,AUH,BTD,C3,CYP1B1,CYP2C8,CYP2C9,CYP2C18,CYP3A5,AKR1C1,AKR1C2,EHHADH,ENO1,ETFDH,ACSL3,GPX1,GSTA1,HADH,HPGD,IDH2,IGF1,IDO1,LDHA,ME1,PCCA,PEX7,ATP8B1,PFKP,PLA2G1B,PTGIS,PTGS2,ACSM3,SULT2A1,UGT2B15,PLA2G10,AKR1C3,ACAA2,ECI2,ME3,SLC27A5,ABHD2,PTGR1,MPC2,MTHFD1L,ANGPTL3,CYP2S1,DCXR,ACSS2,ELOVL5,ELOVL6,FA2H,ACSF2,ADTRP,ACSM6,PM20D1,LDHD	63/512
18_Member	GO Biological Processes	GO:0006631	fatty acid metabolic process	-11.5714	-9.18665	33,35,36,131,241,549,718,1545,1558,1559,1562,1645,1646,1962,2110,2181,2876,2938,3033,3248,5095,5191,5319,5740,5743,6296,8399,8644,10449,10455,10998,11057,22949,27329,29785,60481,79071,79152,80221,84830,142827,148811	ACADL,ACADS,ACADSB,ADH7,ALOX5AP,AUH,C3,CYP1B1,CYP2C8,CYP2C9,CYP2C18,AKR1C1,AKR1C2,EHHADH,ETFDH,ACSL3,GPX1,GSTA1,HADH,HPGD,PCCA,PEX7,PLA2G1B,PTGIS,PTGS2,ACSM3,PLA2G10,AKR1C3,ACAA2,ECI2,SLC27A5,ABHD2,PTGR1,ANGPTL3,CYP2S1,ELOVL5,ELOVL6,FA2H,ACSF2,ADTRP,ACSM6,PM20D1	42/321
18_Member	GO Biological Processes	GO:0001676	long-chain fatty acid metabolic process	-7.53018	-5.55269	33,1545,1558,1559,1562,2181,2876,2938,5740,5743,8399,8644,10998,22949,29785,60481,79071,80221,84830	ACADL,CYP1B1,CYP2C8,CYP2C9,CYP2C18,ACSL3,GPX1,GSTA1,PTGIS,PTGS2,PLA2G10,AKR1C3,SLC27A5,PTGR1,CYP2S1,ELOVL5,ELOVL6,ACSF2,ADTRP	19/110
18_Member	GO Biological Processes	GO:0044283	small molecule biosynthetic process	-7.36139	-5.40553	100,216,241,635,1491,1558,1559,1718,2023,2203,2752,2805,3158,3620,3638,3706,3930,3953,4190,5319,5740,5743,6296,7108,8399,8644,8789,9104,10449,10998,11057,25902,26002,53630,55256,56997,60481,79071,79152,124975,142827,165679,340485	ADA,ALDH1A1,ALOX5AP,BHMT,CTH,CYP2C8,CYP2C9,DHCR24,ENO1,FBP1,GLUL,GOT1,HMGCS2,IDO1,INSIG1,ITPKA,LBR,LEPR,MDH1,PLA2G1B,PTGIS,PTGS2,ACSM3,TM7SF2,PLA2G10,AKR1C3,FBP2,RGN,ACAA2,SLC27A5,ABHD2,MTHFD1L,MOXD1,BCO1,ADI1,COQ8A,ELOVL5,ELOVL6,FA2H,GGT6,ACSM6,SPTSSB,ACER2	43/456
18_Member	Reactome Gene Sets	R-HSA-8978868	Fatty acid metabolism	-6.58786	-4.73761	33,35,241,1545,1558,1559,1962,2181,2876,3033,3248,5095,5740,5743,6296,8644,10449,10455,22949,60481,79071,80221,142827	ACADL,ACADS,ALOX5AP,CYP1B1,CYP2C8,CYP2C9,EHHADH,ACSL3,GPX1,HADH,HPGD,PCCA,PTGIS,PTGS2,ACSM3,AKR1C3,ACAA2,ECI2,PTGR1,ELOVL5,ELOVL6,ACSF2,ACSM6	23/177
18_Member	GO Biological Processes	GO:0033559	unsaturated fatty acid metabolic process	-6.57415	-4.72665	1545,1558,1559,1562,1645,1646,2876,2938,3248,5740,5743,8399,8644,22949,29785,60481,79071	CYP1B1,CYP2C8,CYP2C9,CYP2C18,AKR1C1,AKR1C2,GPX1,GSTA1,HPGD,PTGIS,PTGS2,PLA2G10,AKR1C3,PTGR1,CYP2S1,ELOVL5,ELOVL6	17/102
18_Member	GO Biological Processes	GO:0006690	icosanoid metabolic process	-6.49793	-4.66259	241,1545,1558,1559,1562,1645,1646,2876,2938,3248,5319,5740,5743,8399,8644,22949,29785,124975	ALOX5AP,CYP1B1,CYP2C8,CYP2C9,CYP2C18,AKR1C1,AKR1C2,GPX1,GSTA1,HPGD,PLA2G1B,PTGIS,PTGS2,PLA2G10,AKR1C3,PTGR1,CYP2S1,GGT6	18/115
18_Member	GO Biological Processes	GO:0006692	prostanoid metabolic process	-5.87739	-4.12763	1645,1646,2938,3248,5740,5743,8399,8644,22949,29785	AKR1C1,AKR1C2,GSTA1,HPGD,PTGIS,PTGS2,PLA2G10,AKR1C3,PTGR1,CYP2S1	10/39
18_Member	GO Biological Processes	GO:0006693	prostaglandin metabolic process	-5.87739	-4.12763	1645,1646,2938,3248,5740,5743,8399,8644,22949,29785	AKR1C1,AKR1C2,GSTA1,HPGD,PTGIS,PTGS2,PLA2G10,AKR1C3,PTGR1,CYP2S1	10/39
18_Member	KEGG Pathway	hsa00590	Arachidonic acid metabolism	-4.80483	-3.21519	1558,1559,3248,5319,5320,5740,5743,8399,8644,22949,54979	CYP2C8,CYP2C9,HPGD,PLA2G1B,PLA2G2A,PTGIS,PTGS2,PLA2G10,AKR1C3,PTGR1,PLAAT2	11/61
18_Member	GO Biological Processes	GO:0019369	arachidonic acid metabolic process	-4.382	-2.86081	1545,1558,1559,1562,2876,5740,5743,8399,8644,29785	CYP1B1,CYP2C8,CYP2C9,CYP2C18,GPX1,PTGIS,PTGS2,PLA2G10,AKR1C3,CYP2S1	10/56
18_Member	GO Biological Processes	GO:0046394	carboxylic acid biosynthetic process	-4.31672	-2.80472	216,241,635,1491,1558,1559,2752,2805,3620,5319,5740,5743,6296,8399,8644,9104,10998,11057,25902,55256,60481,79071,79152,124975,142827	ALDH1A1,ALOX5AP,BHMT,CTH,CYP2C8,CYP2C9,GLUL,GOT1,IDO1,PLA2G1B,PTGIS,PTGS2,ACSM3,PLA2G10,AKR1C3,RGN,SLC27A5,ABHD2,MTHFD1L,ADI1,ELOVL5,ELOVL6,FA2H,GGT6,ACSM6	25/274
18_Member	Reactome Gene Sets	R-HSA-9018678	Biosynthesis of specialized proresolving mediators (SPMs)	-4.29388	-2.78669	241,1558,1559,3248,5743,22949	ALOX5AP,CYP2C8,CYP2C9,HPGD,PTGS2,PTGR1	6/19
18_Member	GO Biological Processes	GO:0016053	organic acid biosynthetic process	-4.23958	-2.74106	216,241,635,1491,1558,1559,2752,2805,3620,5319,5740,5743,6296,8399,8644,9104,10998,11057,25902,55256,60481,79071,79152,124975,142827	ALDH1A1,ALOX5AP,BHMT,CTH,CYP2C8,CYP2C9,GLUL,GOT1,IDO1,PLA2G1B,PTGIS,PTGS2,ACSM3,PLA2G10,AKR1C3,RGN,SLC27A5,ABHD2,MTHFD1L,ADI1,ELOVL5,ELOVL6,FA2H,GGT6,ACSM6	25/277
18_Member	Reactome Gene Sets	R-HSA-2142753	Arachidonic acid metabolism	-4.17985	-2.69699	241,1545,1558,1559,2876,3248,5740,5743,8644,22949	ALOX5AP,CYP1B1,CYP2C8,CYP2C9,GPX1,HPGD,PTGIS,PTGS2,AKR1C3,PTGR1	10/59
18_Member	GO Biological Processes	GO:0046456	icosanoid biosynthetic process	-4.02764	-2.56613	241,1558,1559,5319,5740,5743,8399,8644,124975	ALOX5AP,CYP2C8,CYP2C9,PLA2G1B,PTGIS,PTGS2,PLA2G10,AKR1C3,GGT6	9/50
18_Member	GO Biological Processes	GO:0006633	fatty acid biosynthetic process	-3.35043	-2.01682	1558,1559,5319,5740,5743,6296,8399,8644,11057,60481,79071,79152,142827	CYP2C8,CYP2C9,PLA2G1B,PTGIS,PTGS2,ACSM3,PLA2G10,AKR1C3,ABHD2,ELOVL5,ELOVL6,FA2H,ACSM6	13/116
18_Member	KEGG Pathway	hsa00591	Linoleic acid metabolism	-3.1081	-1.83256	1558,1559,5319,5320,8399,54979	CYP2C8,CYP2C9,PLA2G1B,PLA2G2A,PLA2G10,PLAAT2	6/30
18_Member	GO Biological Processes	GO:0072330	monocarboxylic acid biosynthetic process	-2.78849	-1.57379	1558,1559,3620,5319,5740,5743,6296,8399,8644,10998,11057,60481,79071,79152,142827	CYP2C8,CYP2C9,IDO1,PLA2G1B,PTGIS,PTGS2,ACSM3,PLA2G10,AKR1C3,SLC27A5,ABHD2,ELOVL5,ELOVL6,FA2H,ACSM6	15/166
18_Member	Reactome Gene Sets	R-HSA-2162123	Synthesis of Prostaglandins (PG) and Thromboxanes (TX)	-2.70403	-1.51534	3248,5740,5743,8644	HPGD,PTGIS,PTGS2,AKR1C3	4/15
18_Member	GO Biological Processes	GO:0006636	unsaturated fatty acid biosynthetic process	-2.49344	-1.34656	5740,5743,8399,8644,60481,79071	PTGIS,PTGS2,PLA2G10,AKR1C3,ELOVL5,ELOVL6	6/39
18_Member	Reactome Gene Sets	R-HSA-9018677	Biosynthesis of DHA-derived SPMs	-2.48873	-1.34565	1558,1559,3248,5743	CYP2C8,CYP2C9,HPGD,PTGS2	4/17
18_Member	GO Biological Processes	GO:0019371	cyclooxygenase pathway	-2.42004	-1.29628	5740,5743,8644	PTGIS,PTGS2,AKR1C3	3/9
18_Member	WikiPathways	WP4719	Eicosanoid metabolism via cyclooxygenases (COX)	-2.24346	-1.16114	1962,3248,5740,5743,22949	EHHADH,HPGD,PTGIS,PTGS2,PTGR1	5/31
18_Member	GO Biological Processes	GO:0001516	prostaglandin biosynthetic process	-2.14031	-1.08	5740,5743,8399,8644	PTGIS,PTGS2,PLA2G10,AKR1C3	4/21
18_Member	GO Biological Processes	GO:0046457	prostanoid biosynthetic process	-2.14031	-1.08	5740,5743,8399,8644	PTGIS,PTGS2,PLA2G10,AKR1C3	4/21
19_Summary	GO Biological Processes	GO:0043068	positive regulation of programmed cell death	-15.4812	-12.595	301,355,580,597,604,1513,1514,1545,1649,1687,1728,1871,1894,2191,2487,2627,2634,2852,3162,3169,3248,3433,3569,3620,3624,3672,3778,3956,4118,4318,4332,4609,4760,5063,5319,5621,5654,5740,5743,6279,6280,6347,6423,6424,7052,7057,7098,7153,7159,7164,7305,7805,8644,8682,9353,9590,11117,25803,27250,51083,51330,51776,84034,85477,115362,120892,3689,3776,340485	ANXA1,FAS,BARD1,BCL2A1,BCL6,CTSK,CTSL,CYP1B1,DDIT3,GSDME,NQO1,E2F3,ECT2,FAP,FRZB,GATA6,GBP2,GPER1,HMOX1,FOXA1,HPGD,IFIT2,IL6,IDO1,INHBA,ITGA1,KCNMA1,LGALS1,MAL,MMP9,MNDA,MYC,NEUROD1,PAK3,PLA2G1B,PRNP,HTRA1,PTGIS,PTGS2,S100A8,S100A9,CCL2,SFRP2,SFRP4,TGM2,THBS1,TLR3,TOP2A,TP53BP2,TPD52L1,TYROBP,LAPTM5,AKR1C3,PEA15,SLIT2,AKAP12,EMILIN1,SPDEF,PDCD4,GAL,TNFRSF12A,MAP3K20,EMILIN2,SCIN,GBP5,LRRK2,ITGB2,…	69/-
19_Member	GO Biological Processes	GO:0043068	positive regulation of programmed cell death	-15.4812	-12.595	301,355,580,597,604,1513,1514,1545,1649,1687,1728,1871,1894,2191,2487,2627,2634,2852,3162,3169,3248,3433,3569,3620,3624,3672,3778,3956,4118,4318,4332,4609,4760,5063,5319,5621,5654,5740,5743,6279,6280,6347,6423,6424,7052,7057,7098,7153,7159,7164,7305,7805,8644,8682,9353,9590,11117,25803,27250,51083,51330,51776,84034,85477,115362,120892	ANXA1,FAS,BARD1,BCL2A1,BCL6,CTSK,CTSL,CYP1B1,DDIT3,GSDME,NQO1,E2F3,ECT2,FAP,FRZB,GATA6,GBP2,GPER1,HMOX1,FOXA1,HPGD,IFIT2,IL6,IDO1,INHBA,ITGA1,KCNMA1,LGALS1,MAL,MMP9,MNDA,MYC,NEUROD1,PAK3,PLA2G1B,PRNP,HTRA1,PTGIS,PTGS2,S100A8,S100A9,CCL2,SFRP2,SFRP4,TGM2,THBS1,TLR3,TOP2A,TP53BP2,TPD52L1,TYROBP,LAPTM5,AKR1C3,PEA15,SLIT2,AKAP12,EMILIN1,SPDEF,PDCD4,GAL,TNFRSF12A,MAP3K20,EMILIN2,SCIN,GBP5,LRRK2	66/561
19_Member	GO Biological Processes	GO:0010942	positive regulation of cell death	-15.3182	-12.4747	301,355,580,597,604,1513,1514,1545,1649,1687,1728,1871,1894,2191,2487,2627,2634,2852,3162,3169,3248,3433,3569,3620,3624,3672,3689,3776,3778,3956,4118,4318,4332,4609,4760,5063,5319,5621,5654,5740,5743,6279,6280,6347,6423,6424,7052,7057,7098,7153,7159,7164,7305,7805,8644,8682,9353,9590,11117,25803,27250,51083,51330,51776,84034,85477,115362,120892,340485	ANXA1,FAS,BARD1,BCL2A1,BCL6,CTSK,CTSL,CYP1B1,DDIT3,GSDME,NQO1,E2F3,ECT2,FAP,FRZB,GATA6,GBP2,GPER1,HMOX1,FOXA1,HPGD,IFIT2,IL6,IDO1,INHBA,ITGA1,ITGB2,KCNK2,KCNMA1,LGALS1,MAL,MMP9,MNDA,MYC,NEUROD1,PAK3,PLA2G1B,PRNP,HTRA1,PTGIS,PTGS2,S100A8,S100A9,CCL2,SFRP2,SFRP4,TGM2,THBS1,TLR3,TOP2A,TP53BP2,TPD52L1,TYROBP,LAPTM5,AKR1C3,PEA15,SLIT2,AKAP12,EMILIN1,SPDEF,PDCD4,GAL,TNFRSF12A,MAP3K20,EMILIN2,SCIN,GBP5,…	69/609
19_Member	GO Biological Processes	GO:0043065	positive regulation of apoptotic process	-14.1192	-11.4334	301,355,580,597,604,1513,1514,1545,1649,1687,1728,1871,1894,2191,2487,2627,2852,3162,3169,3248,3433,3569,3620,3624,3672,3778,3956,4118,4318,4332,4609,4760,5063,5319,5621,5654,5740,5743,6279,6280,6347,6423,6424,7052,7057,7098,7153,7159,7164,7305,8644,8682,9353,9590,11117,25803,27250,51083,51330,51776,84034,85477	ANXA1,FAS,BARD1,BCL2A1,BCL6,CTSK,CTSL,CYP1B1,DDIT3,GSDME,NQO1,E2F3,ECT2,FAP,FRZB,GATA6,GPER1,HMOX1,FOXA1,HPGD,IFIT2,IL6,IDO1,INHBA,ITGA1,KCNMA1,LGALS1,MAL,MMP9,MNDA,MYC,NEUROD1,PAK3,PLA2G1B,PRNP,HTRA1,PTGIS,PTGS2,S100A8,S100A9,CCL2,SFRP2,SFRP4,TGM2,THBS1,TLR3,TOP2A,TP53BP2,TPD52L1,TYROBP,AKR1C3,PEA15,SLIT2,AKAP12,EMILIN1,SPDEF,PDCD4,GAL,TNFRSF12A,MAP3K20,EMILIN2,SCIN	62/539
20_Summary	GO Biological Processes	GO:0071345	cellular response to cytokine stimulus	-15.3011	-12.471	210,355,361,608,960,1116,1277,1438,1491,1513,1545,1687,1809,2207,2244,2266,2296,2634,2852,2919,2920,3055,3373,3428,3434,3569,3576,3627,3953,3977,4283,4332,4360,4501,5214,5618,5740,6347,6355,6362,6558,6751,6776,7032,7057,7098,7412,7424,7850,7852,8399,8519,8531,8638,9021,9076,9314,9447,9590,10288,10402,10410,10563,10581,10673,29887,50506,51208,51554,53905,54209,54836,55512,57007,64388,115362,120892…	ALAD,FAS,AQP4,TNFRSF17,CD44,CHI3L1,COL1A1,CSF2RA,CTH,CTSK,CYP1B1,GSDME,DPYSL3,FCER1G,FGB,FGG,FOXC1,GBP2,GPER1,CXCL1,CXCL2,HCK,HYAL1,IFI16,IFIT1,IL6,CXCL8,CXCL10,LEPR,LIFR,CXCL9,MNDA,MRC1,MT1X,PFKP,PRLR,PTGIS,CCL2,CCL8,CCL18,SLC12A2,SSTR1,STAT5A,TFF2,THBS1,TLR3,VCAM1,VEGFC,IL1R2,CXCR4,PLA2G10,IFITM1,YBX3,OASL,SOCS3,CLDN1,KLF4,AIM2,AKAP12,LILRB2,ST3GAL6,IFITM3,CXCL13,IFITM2,TNFSF13B,SNX10,DUOX2,CLD…	81/-
20_Member	GO Biological Processes	GO:0071345	cellular response to cytokine stimulus	-15.3011	-12.471	210,355,361,608,960,1116,1277,1438,1491,1513,1545,1687,1809,2207,2244,2266,2296,2634,2852,2919,2920,3055,3373,3428,3434,3569,3576,3627,3953,3977,4283,4332,4360,4501,5214,5618,5740,6347,6355,6362,6558,6751,6776,7032,7057,7098,7412,7424,7850,7852,8399,8519,8531,8638,9021,9076,9314,9447,9590,10288,10402,10410,10563,10581,10673,29887,50506,51208,51554,53905,54209,54836,55512,57007,64388,115362,120892	ALAD,FAS,AQP4,TNFRSF17,CD44,CHI3L1,COL1A1,CSF2RA,CTH,CTSK,CYP1B1,GSDME,DPYSL3,FCER1G,FGB,FGG,FOXC1,GBP2,GPER1,CXCL1,CXCL2,HCK,HYAL1,IFI16,IFIT1,IL6,CXCL8,CXCL10,LEPR,LIFR,CXCL9,MNDA,MRC1,MT1X,PFKP,PRLR,PTGIS,CCL2,CCL8,CCL18,SLC12A2,SSTR1,STAT5A,TFF2,THBS1,TLR3,VCAM1,VEGFC,IL1R2,CXCR4,PLA2G10,IFITM1,YBX3,OASL,SOCS3,CLDN1,KLF4,AIM2,AKAP12,LILRB2,ST3GAL6,IFITM3,CXCL13,IFITM2,TNFSF13B,SNX10,DUOX2,CLD…	77/730
20_Member	GO Biological Processes	GO:0034612	response to tumor necrosis factor	-8.12276	-6.07524	355,608,929,1116,1277,1513,1545,1687,2634,2852,3373,3576,5743,6347,6355,6362,6401,7057,7412,7846,8531,9076,9447,9590,10673,51208,55512,120892	FAS,TNFRSF17,CD14,CHI3L1,COL1A1,CTSK,CYP1B1,GSDME,GBP2,GPER1,HYAL1,CXCL8,PTGS2,CCL2,CCL8,CCL18,SELE,THBS1,VCAM1,TUBA1A,YBX3,CLDN1,AIM2,AKAP12,TNFSF13B,CLDN18,SMPD3,LRRK2	28/210
20_Member	GO Biological Processes	GO:0019221	cytokine-mediated signaling pathway	-7.45118	-5.48637	355,608,960,1438,2207,2296,2919,2920,3055,3569,3576,3627,3953,3977,4283,5618,6347,6355,6362,6776,7032,7850,7852,8519,8638,9447,10288,10410,10563,10581,10673,50506,51208,51554,53905,54209,57007,64388	FAS,TNFRSF17,CD44,CSF2RA,FCER1G,FOXC1,CXCL1,CXCL2,HCK,IL6,CXCL8,CXCL10,LEPR,LIFR,CXCL9,PRLR,CCL2,CCL8,CCL18,STAT5A,TFF2,IL1R2,CXCR4,IFITM1,OASL,AIM2,LILRB2,IFITM3,CXCL13,IFITM2,TNFSF13B,DUOX2,CLDN18,ACKR4,DUOX1,TREM2,ACKR3,GREM2	38/373
20_Member	GO Biological Processes	GO:0071356	cellular response to tumor necrosis factor	-6.87643	-4.98424	355,608,1116,1277,1513,1545,1687,2634,2852,3373,3576,6347,6355,6362,7057,7412,8531,9076,9447,9590,10673,51208,55512,120892	FAS,TNFRSF17,CHI3L1,COL1A1,CTSK,CYP1B1,GSDME,GBP2,GPER1,HYAL1,CXCL8,CCL2,CCL8,CCL18,THBS1,VCAM1,YBX3,CLDN1,AIM2,AKAP12,TNFSF13B,CLDN18,SMPD3,LRRK2	24/184
